# Supplementary material for: Arene C−H Activation at Aluminium(I): meta Selectivity Driven by the Electronics of SNAr Chemistry
Source: PubMed Central journal article supplement (PMC7693242; doi:10.1002/anie.202008557), 2020-09-02
Supplement: ANIE-59-20376-s001.pdf [file ANIE-59-20376-s001.pdf]

Supporting Information

**Arene C–H Activation at Aluminium(I): *meta* Selectivity Driven by the Electronics of S<sub>N</sub>Ar Chemistry**

*Jamie Hicks, Petra Vasko, Andreas Heilmann, Jose M. Goicoechea,\* and Simon Aldridge\**

anie\_202008557\_sm\_miscellaneous\_information.pdf

## Supplementary Information

### **This PDF file includes:**

|                                                     |     |
|-----------------------------------------------------|-----|
| Materials and Methods                               | s2  |
| Synthetic and characterizing data for new compounds | s3  |
| <sup>1</sup> H NMR spectra of new compounds         | s7  |
| X-ray crystallographic studies                      | s10 |
| Computational details                               | s18 |
| References for supporting information               | s36 |

Figures S1 – S12

Table S1

(36 pages total)

## Materials and Methods

**General considerations.** All manipulations were carried out using standard Schlenk line or dry-box techniques under an atmosphere of argon or dinitrogen. Solvents were degassed by sparging with argon and dried by passing through a column of the appropriate drying agent. Xylenes (ortho, meta and para) and *n*-butylbenzene were refluxed over potassium, with the solvent then being distilled and stored under argon in Teflon valve ampoules. NMR spectra were measured in benzene- $d_6$  (which was dried over potassium) or thf- $d_8$  (which was dried over  $LiAlH_4$ ), with the solvent then being distilled under reduced pressure and stored under argon in Teflon valve ampoules. NMR samples were prepared under argon in 5 mm Wilmad 507-PP tubes fitted with J. Young Teflon valves.  $^1H$  and  $^{13}C\{^1H\}$  NMR spectra were recorded on Bruker Avance III HD nanobay 400 MHz or Bruker Avance III 500 MHz spectrometer at ambient temperature and referenced internally to residual protio-solvent ( $^1H$ ) or solvent ( $^{13}C$ ) resonances and are reported relative to tetramethylsilane ( $\delta = 0$  ppm). Assignments were confirmed using two-dimensional  $^1H$ - $^1H$  and  $^{13}C$ - $^1H$  NMR correlation experiments. Chemical shifts are quoted in  $\delta$  (ppm) and coupling constants in Hz. Elemental analyses were carried out by London Metropolitan University. Compound **1** was prepared by the literature method.<sup>S1</sup>

### Synthetic and characterizing data for new compounds

**Toluene activation – synthesis of 3a and 3b.** A solution of **1** (0.200 g, 0.136 mmol) in toluene (10 mL) was heated at 80 °C and stirred for 2 days. During the 2 day reaction, the solution slowly changed colour from yellow to almost colourless. The reaction was allowed to slowly cool to room temperature and left to stand at room temperature overnight to give crystals containing a mixture of **3a** and **3b** in an approximate 2:1 ratio (0.180 g, 80%). **3a**; <sup>1</sup>H NMR (500 MHz, d<sub>8</sub>-THF, 298 K): δ = 0.22 (d, <sup>3</sup>J<sub>HH</sub> = 6.7 Hz, 12H, CH(CH<sub>3</sub>)<sub>2</sub>), 0.74 (d, <sup>3</sup>J<sub>HH</sub> = 6.9 Hz, 12H, CH(CH<sub>3</sub>)<sub>2</sub>), 0.96 (d, <sup>3</sup>J<sub>HH</sub> = 6.8 Hz, 12H, CH(CH<sub>3</sub>)<sub>2</sub>), 1.11 (s, 36H, C(CH<sub>3</sub>)<sub>3</sub>), 1.26 (d, <sup>3</sup>J<sub>HH</sub> = 6.9 Hz, 12H, CH(CH<sub>3</sub>)<sub>2</sub>), 1.70 (s, 6H, C(CH<sub>3</sub>)<sub>2</sub>), 1.83 (s, 6H, C(CH<sub>3</sub>)<sub>2</sub>), 2.12 (s, 6H, Al-tol *m*-CH<sub>3</sub>), 3.05 (sept., <sup>3</sup>J<sub>HH</sub> = 6.8 Hz, 4H, CH(CH<sub>3</sub>)<sub>2</sub>), 3.60 (br., 2H, AlH), 3.71 (sept., <sup>3</sup>J<sub>HH</sub> = 6.8 Hz, 4H, CH(CH<sub>3</sub>)<sub>2</sub>), 5.66 (d, 4H, <sup>4</sup>J<sub>HH</sub> = 1.9 Hz, NON-*o*-CH), 6.43 (d, <sup>4</sup>J<sub>HH</sub> = 1.9 Hz, 4H, NON-*p*-CH), 6.73 (m, 2H, Al-tol *p*-CH), 6.86 (m, 2H, Al-tol *m*-CH), 6.98-7.23 (m, 12H ArH), 7.33 (br., 4H, Al-tol *o*-CH); <sup>13</sup>C{<sup>1</sup>H} NMR (126 MHz, d<sub>8</sub>-THF, 298 K): δ = 21.9 (Al-tol CH<sub>3</sub>) 23.2 (C(CH<sub>3</sub>)<sub>2</sub>), 23.8, 24.8, 25.8, 26.4 (CH(CH<sub>3</sub>)<sub>2</sub>), 27.9, 28.8 (CH(CH<sub>3</sub>)<sub>2</sub>), 32.0 (C(CH<sub>3</sub>)<sub>3</sub>), 33.9 (C(CH<sub>3</sub>)<sub>2</sub>), 35.2 (C(CH<sub>3</sub>)<sub>3</sub>), 36.6 (C(CH<sub>3</sub>)<sub>2</sub>), 103.4, 108.7, 123.2, 124.3, 124.6, 125.9 126.7, 130.9, 134.6, 135.2, 139.0, 140.3, 145.4, 146.3, 146.4, 148.6, 150.2 (Ar-C), 159.7 (Al-C); **3b**; <sup>1</sup>H NMR (500 MHz, d<sub>8</sub>-THF, 298 K): δ = 0.93 (d, <sup>3</sup>J<sub>HH</sub> = 6.8 Hz, 12H, CH(CH<sub>3</sub>)<sub>2</sub>), 0.98 (d, <sup>3</sup>J<sub>HH</sub> = 6.8 Hz, 12H, CH(CH<sub>3</sub>)<sub>2</sub>), 1.00 (d, <sup>3</sup>J<sub>HH</sub> = 6.8 Hz, 12H, CH(CH<sub>3</sub>)<sub>2</sub>), 1.09 (s, 36H, C(CH<sub>3</sub>)<sub>3</sub>), 1.26 (d, <sup>3</sup>J<sub>HH</sub> = 6.8 Hz, 12H, CH(CH<sub>3</sub>)<sub>2</sub>), 1.17 (s, 4H, AlCH<sub>2</sub>), 1.52 (s, 6H, C(CH<sub>3</sub>)<sub>2</sub>), 1.62 (s, 6H, C(CH<sub>3</sub>)<sub>2</sub>), 3.60 (br., 2H, AlH), 3.67 (sept., <sup>3</sup>J<sub>HH</sub> = 6.8 Hz, 4H, CH(CH<sub>3</sub>)<sub>2</sub>), 3.72 (sept., <sup>3</sup>J<sub>HH</sub> = 6.8 Hz, 4H, CH(CH<sub>3</sub>)<sub>2</sub>), 5.64 (d, 4H, <sup>4</sup>J<sub>HH</sub> = 2.0 Hz, NON-*o*-CH), 5.98 (m, 4H, Al-Bz *o*-CH), 6.31 (m, 2H Al-Bz *p*-CH), 6.32 (d, <sup>4</sup>J<sub>HH</sub> = 2.0 Hz, 4H, NON-*p*-CH), 6.53 (m, 4H, Al-Bz *m*-CH), 6.98-7.23 (m, 12H ArH); <sup>13</sup>C{<sup>1</sup>H} NMR (126 MHz, d<sub>8</sub>-THF, 298 K): δ = 24.8, 25.1, 25.6, 25.8 (CH(CH<sub>3</sub>)<sub>2</sub>), 26.0 (C(CH<sub>3</sub>)<sub>2</sub>), 26.7 (AlCH<sub>2</sub>), 28.2, 28.3 (CH(CH<sub>3</sub>)<sub>2</sub>), 31.5 (C(CH<sub>3</sub>)<sub>2</sub>), 32.1 (C(CH<sub>3</sub>)<sub>3</sub>), 35.1 (C(CH<sub>3</sub>)<sub>3</sub>), 36.5 (C(CH<sub>3</sub>)<sub>2</sub>), 103.0, 109.0, 118.1, 123.6, 124.2, 124.4, 126.8, 128.2, 130.5, 146.1, 146.3, 147.7, 148.3, 148.5, 154.2 (Ar-C). anal. calc. for C<sub>108</sub>H<sub>140</sub>Al<sub>2</sub>K<sub>2</sub>N<sub>4</sub>O<sub>2</sub>: C 78.21%, H 8.51%, N 3.38%, found: C 78.13%, H 8.64%, N 3.52%.

**Anisole activation – synthesis of 4.** A solution of **1** (0.200 g, 0.136 mmol) in anisole (10 mL) was heated at 80 °C and stirred for 30 mins. On heating the reaction solution to 80 °C, the solution changed colour from yellow to almost colourless. The reaction was allowed to cool to room temperature whereupon volatiles were removed *in vacuo*. The residual was dissolved in the minimum volume of warm toluene (*ca.* 2 mL at 60 °C) and slowly cooled to room temperature overnight to give **4** as colourless crystals (0.190 g, 83%). <sup>1</sup>H NMR (500 MHz, C<sub>6</sub>D<sub>6</sub>, 298 K): δ = 0.10 (br., 6H, AlCH<sub>3</sub>) 1.13-1.19 (m, 48H, CH(CH<sub>3</sub>)<sub>2</sub>), 1.34 (s, 36H, C(CH<sub>3</sub>)<sub>3</sub>), 1.60 (s, 12H, C(CH<sub>3</sub>)<sub>2</sub>), 3.93 (br., 4H, CH(CH<sub>3</sub>)<sub>2</sub>), 4.02 (br., 4H, CH(CH<sub>3</sub>)<sub>2</sub>), 6.03 (d, 4H, <sup>4</sup>J<sub>HH</sub> = 1.9 Hz, NON-*o*-CH), 6.30 (br., 4H, OPh *o*-CH), 6.51 (br., 2H, OPh *p*-CH), 6.70 (d, <sup>4</sup>J<sub>HH</sub> = 1.9 Hz, 4H, NON-*p*-CH), 6.84 (br., 4H, OPh *m*-CH), 6.98-7.13 (m, 12H, ArH), <sup>13</sup>C{<sup>1</sup>H} NMR (126 MHz, C<sub>6</sub>D<sub>6</sub>, 298 K): δ = -3.7 (Al-CH<sub>3</sub>), 23.5 (C(CH<sub>3</sub>)<sub>2</sub>), 25.0, 25.5, 25.9, 26.0 (CH(CH<sub>3</sub>)<sub>2</sub>), 27.8, 28.1 (CH(CH<sub>3</sub>)<sub>2</sub>), 32.0 (C(CH<sub>3</sub>)<sub>2</sub>), 32.2 (C(CH<sub>3</sub>)<sub>3</sub>), 35.2 (C(CH<sub>3</sub>)<sub>3</sub>), 36.6 (C(CH<sub>3</sub>)<sub>2</sub>), 105.0, 109.0, 117.8, 120.4, 123.5, 124.3, 124.6, 129.9, 130.6, 139.1, 145.1, 146.7, 147.7, 148.6, 149.9 (Ar-C),

161.4 (Al-C); anal. calc. for  $C_{108}H_{140}Al_2K_2N_4O_4$ : C 76.73%, H 8.35%, N 3.31%, found: C 76.67%, H 8.69%, N 3.51%.

***o*-Xylene activation – synthesis of 5.** A solution of **1** (0.200 g, 0.136 mmol) in *o*-xylene (10 mL) was heated and stirred at 80 °C for 2 days. During the 2 day reaction, the solution slowly changed colour from yellow to almost colourless. The reaction was allowed to slowly cool to room temperature overnight to give **5** as colourless crystals (0.155 g, 68%).  $^1H$  NMR (500 MHz,  $d_8$ -THF, 298 K):  $\delta$  = 0.88 (d,  $^3J_{HH}$  = 6.8 Hz, 12H, CH(CH<sub>3</sub>)<sub>2</sub>), 0.92 (d,  $^3J_{HH}$  = 6.9 Hz, 12H, CH(CH<sub>3</sub>)<sub>2</sub>), 0.95 (d,  $^3J_{HH}$  = 6.8 Hz, 12H, CH(CH<sub>3</sub>)<sub>2</sub>), 1.08 (s, 36H, C(CH<sub>3</sub>)<sub>3</sub>), 1.15 (d,  $^3J_{HH}$  = 6.9 Hz, 12H, CH(CH<sub>3</sub>)<sub>2</sub>), 1.26 (s, 4H, AlCH<sub>2</sub>), 1.57 (s, 6H, C(CH<sub>3</sub>)<sub>2</sub>), 1.62 (s, 6H, Al-xy *o*-CH<sub>3</sub>), 1.69 (s, 6H, C(CH<sub>3</sub>)<sub>2</sub>), 3.58 (sept.,  $^3J_{HH}$  = 6.8 Hz, 4H, CH(CH<sub>3</sub>)<sub>2</sub>), 3.68 (sept.,  $^3J_{HH}$  = 6.8 Hz, 4H, CH(CH<sub>3</sub>)<sub>2</sub>), 4.30 (br., 2H, AlH), 5.61 (d, 4H,  $^4J_{HH}$  = 1.9 Hz, NON-*o*-CH), 5.90 (m, 2H, Al-xy *o*-CH), 6.34 (m, 4H, Al-xy *m*- & *p*-CH), 6.55 (m, 2H, Al-xy *m*-CH), 7.04-7.19 (m, 12H, ArH);  $^{13}C\{^1H\}$  NMR (126 MHz,  $d_8$ -THF, 298 K):  $\delta$  = 21.7 (Al-xy CH<sub>3</sub>) 24.6, 24.7, 25.8, (CH(CH<sub>3</sub>)<sub>2</sub>), 26.3 (C(CH<sub>3</sub>)<sub>2</sub>), 26.7 (CH(CH<sub>3</sub>)<sub>2</sub>), 28.3, 28.5 (CH(CH<sub>3</sub>)<sub>2</sub>), 32.0 (C(CH<sub>3</sub>)<sub>3</sub>), 35.1 (C(CH<sub>3</sub>)<sub>3</sub>), 36.7 (C(CH<sub>3</sub>)<sub>2</sub>), 103.1, 109.5, 119.0, 123.6, 124.3, 124.7, 128.4, 129.3, 131.0, 134.5, 140.7, 145.6, 146.3, 148.0, 148.5, 148.6, 151.8 (Ar-C); anal. calc. for  $C_{110}H_{144}Al_2K_2N_4O_2$ : C 78.34%, H 8.61%, N 3.32%, found: C 78.50%, H 8.75%, N 3.16%.

***m*-Xylene activation – synthesis of 6a and 6b.** A solution of **1** (0.200 g, 0.136 mmol) in *m*-xylene (10 mL) was heated at 80 °C and stirred for 2 days. During the 2 day reaction, the solution slowly changed colour from yellow to almost colourless. The reaction was allowed to cool to room temperature and volatiles were removed *in vacuo*. The residual was dissolved in the minimum volume of boiling *n*-hexane (*ca.* 5 mL) and slowly cooled to room temperature overnight to give colourless crystals containing a mixture of **6a** and **6b** in an approximate 1:2 ratio (0.160 g, 70%). **6a**;  $^1H$  NMR (500 MHz,  $d_8$ -THF, 298 K):  $\delta$  = 0.21 (d,  $^3J_{HH}$  = 6.7 Hz, 12H, CH(CH<sub>3</sub>)<sub>2</sub>), 0.74 (d,  $^3J_{HH}$  = 6.9 Hz, 12H, CH(CH<sub>3</sub>)<sub>2</sub>), 0.96 (d,  $^3J_{HH}$  = 6.8 Hz, 12H, CH(CH<sub>3</sub>)<sub>2</sub>), 1.11 (s, 36H, C(CH<sub>3</sub>)<sub>3</sub>), 1.26 (d,  $^3J_{HH}$  = 6.9 Hz, 12H, CH(CH<sub>3</sub>)<sub>2</sub>), 1.70 (s, 6H, C(CH<sub>3</sub>)<sub>2</sub>), 1.83 (s, 6H, C(CH<sub>3</sub>)<sub>2</sub>), 2.10, (s, 6H, *m*-CH<sub>3</sub>), 2.13 (s, 6H, *m*-CH<sub>3</sub>), 3.04 (sept.,  $^3J_{HH}$  = 6.8 Hz, 4H, CH(CH<sub>3</sub>)<sub>2</sub>), 3.67 (sept.,  $^3J_{HH}$  = 6.9 Hz, 4H, CH(CH<sub>3</sub>)<sub>2</sub>), 3.80 (br., 2H, AlH), 5.67 (d, 4H,  $^4J_{HH}$  = 1.9 Hz, NON-*o*-CH), 6.43 (d,  $^4J_{HH}$  = 1.9 Hz, 4H, NON-*p*-CH), 6.73 (m, 2H, Al-xy *p*-CH), 6.98-7.18 (m, 12H ArH), 7.25 (br., 4H, Al-xy *o*-CH);  $^{13}C\{^1H\}$  NMR (126 MHz,  $d_8$ -THF, 298 K):  $\delta$  = 21.8, 21.9 (Al-xy CH<sub>3</sub>) 23.2 (C(CH<sub>3</sub>)<sub>2</sub>), 23.8, 24.9, 25.8, 26.8 (CH(CH<sub>3</sub>)<sub>2</sub>), 27.9, 28.8 (CH(CH<sub>3</sub>)<sub>2</sub>), 32.0 (C(CH<sub>3</sub>)<sub>3</sub>), 33.9 (C(CH<sub>3</sub>)<sub>2</sub>), 35.2 (C(CH<sub>3</sub>)<sub>3</sub>), 36.6 (C(CH<sub>3</sub>)<sub>2</sub>), 103.3, 108.7, 123.2, 124.3, 124.6, 125.2, 125.9 126.8, 130.7, 134.6, 135.2, 139.0, 140.2, 145.4, 146.5, 148.5, 148.7, 150.1 (Ar-C), 159.6 (Al-C); **6b**;  $^1H$  NMR (500 MHz,  $d_8$ -THF, 298 K):  $\delta$  = 0.93 (d,  $^3J_{HH}$  = 6.8 Hz, 12H, CH(CH<sub>3</sub>)<sub>2</sub>), 0.99 (d,  $^3J_{HH}$  = 6.9 Hz, 12H, CH(CH<sub>3</sub>)<sub>2</sub>), 1.02 (d,  $^3J_{HH}$  = 6.7 Hz, 12H, CH(CH<sub>3</sub>)<sub>2</sub>), 1.10 (s, 36H, C(CH<sub>3</sub>)<sub>3</sub>), 1.15 (s, 4H, AlCH<sub>2</sub>), 1.27 (d,  $^3J_{HH}$  = 6.9 Hz, 12H, CH(CH<sub>3</sub>)<sub>2</sub>), 1.52 (s, 6H, C(CH<sub>3</sub>)<sub>2</sub>), 1.58 (s, 6H, C(CH<sub>3</sub>)<sub>2</sub>), 1.89 (s, 6H, Al-xy *m*-CH<sub>3</sub>), 3.70 (sept.,  $^4J_{HH}$  = 1.9 Hz, 8H, CH(CH<sub>3</sub>)<sub>2</sub>), 3.80 (br., 2H, AlH), 5.65 (d,  $^4J_{HH}$  = 1.9 Hz, 4H, NON-*o*-CH), 5.66 (br., 2H, Al-xy AlCH<sub>2</sub>CCHCMe), 5.95 (d,  $^3J_{HH}$  = 7.6 Hz, 2H, Al-xy AlCH<sub>2</sub>CCHCH), 6.16 (d,  $^3J_{HH}$  = 7.5 Hz, 2H, Al-xy *p*-CH), 6.31 (d,  $^4J_{HH}$  = 1.9 Hz, 4H, NON-*p*-CH), 6.47 (t,  $^4J_{HH}$  = 7.5

Hz, 2H, Al-xy *m*-CH), 6.98-7.24 (m, 12H, ArH);  $^{13}\text{C}\{^1\text{H}\}$  NMR (126 MHz,  $d_8$ -THF, 298 K):  $\delta$  = 21.6 (Al-xy *m*-CH<sub>3</sub>), 24.2, 24.6, 25.6 (CH(CH<sub>3</sub>)<sub>2</sub>), 25.8 (C(CH<sub>3</sub>)<sub>2</sub>), 26.4 (CH(CH<sub>3</sub>)<sub>2</sub>), 26.4 (AlCH<sub>2</sub>), 28.2, 28.3 (CH(CH<sub>3</sub>)<sub>2</sub>), 31.3 (C(CH<sub>3</sub>)<sub>2</sub>), 32.1 (C(CH<sub>3</sub>)<sub>3</sub>), 35.1 (C(CH<sub>3</sub>)<sub>3</sub>), 36.5 (C(CH<sub>3</sub>)<sub>2</sub>), 103.0, 108.9, 119.1, 123.6, 124.1, 124.3, 124.4, 126.5, 127.9, 130.4, 130.8, 135.4, 140.3, 145.7, 146.0, 146.2, 148.3, 148.5, 153.9 (Ar-C); anal. calc. for C<sub>110</sub>H<sub>144</sub>Al<sub>2</sub>K<sub>2</sub>N<sub>4</sub>O<sub>2</sub>: C 78.34%, H 8.61%, N 3.32%, found: C 78.21%, H 8.72%, N 3.17%.

***p*-Xylene activation.** A solution of **1** (0.200 g, 0.136 mmol) in *p*-xylene (10 mL) was heated at 80 °C and stirred for 2 days. During the 2 day reaction, the solution slowly changed colour from yellow to almost colourless. However, unlike the reactions with ortho- and meta-xylene, this reaction produced a sticky colourless polymer-like precipitate. Analysis of a  $^1\text{H}$  NMR spectrum taken of the crude reaction mixture revealed two major **NON** containing products in an approximate 60:40 ratio. The resonances associated with the major of these species match perfectly with those of the previously reported dihydride complex **7**.<sup>51</sup> The resonances of the other species are consistent with C–H activation of a methyl group of *p*-xylene, as these closely resemble those of **3b**. These observations suggest that the C–H activation of *p*-xylene occurs on a methyl group to give the corresponding anion  $[(\text{NON})\text{AlH}\{\text{CH}_2(4\text{-Me-C}_6\text{H}_4)\}]^-$ . Under the reaction conditions however, this anion eliminates *p*-xylylene (which readily polymerises to give poly(*para*-xylene)) yielding the aluminium dihydride anion  $[(\text{NON})\text{AlH}_2]^-$ . Attempts to slow down/stop the elimination of *p*-xylylene from the anion were attempted (by lowering the temperature of the reaction whilst also adjusting the reaction time). However, after multiple attempts, the best isolated ratio of  $[(\text{NON})\text{AlH}\{\text{CH}_2(4\text{-Me-C}_6\text{H}_4)\}]^-$  to  $[(\text{NON})\text{AlH}_2]^-$  was 70:30. This was achieved by heating a solution of K<sub>2</sub>[(NON)Al]<sub>2</sub> (200 mg) in *p*-xylene (10 mL) to 75 °C for 18 hours. Attempts to purify this reaction mixture by crystallization were unfortunately also unsuccessful, as K<sub>2</sub>[(NON)AlH<sub>2</sub>]<sub>2</sub> **7** seemed to crystallize preferentially to K<sub>2</sub>[(NON)AlH{CH<sub>2</sub>(4-Me-C<sub>6</sub>H<sub>4</sub>)}]. However, one reaction produced a handful of crystals of the mixed anion dimer K<sub>2</sub>[(NON)AlH{CH<sub>2</sub>(4-Me-C<sub>6</sub>H<sub>4</sub>)}][(NON)AlH<sub>2</sub>] **9**.

***n*-Butylbenzene activation – synthesis of **8**.** A suspension of K<sub>2</sub>[(NON)Al]<sub>2</sub> (0.200 g, 0.136 mmol) in *n*-butylbenzene (10 mL) was heated and stirred at 80 °C for 7 days. During the 7 day reaction, the reaction mixture slowly changed from a yellow solution/suspension to an almost colourless solution. The reaction was allowed to slowly cool to room temperature, concentrated *in vacuo* (ca. 2 mL) and left to stand at room temperature overnight to give **8** as colourless crystals (0.128 g, 54%).  $^1\text{H}$  NMR (400 MHz, C<sub>6</sub>D<sub>6</sub>, 298 K):  $\delta$  = 0.48 (d,  $^3J_{\text{HH}}$  = 6.6 Hz, 12H, CH(CH<sub>3</sub>)<sub>2</sub>), 0.83 (t,  $^3J_{\text{HH}}$  = 7.2 Hz, 6H, CH<sub>2</sub>CH<sub>2</sub>CH<sub>2</sub>CH<sub>3</sub>), 0.95 (d,  $^3J_{\text{HH}}$  = 6.8 Hz, 12H, CH(CH<sub>3</sub>)<sub>2</sub>), 1.09 (d,  $^3J_{\text{HH}}$  = 6.7 Hz, 12H, CH(CH<sub>3</sub>)<sub>2</sub>), 1.25 (d,  $^3J_{\text{HH}}$  = 6.7 Hz, 12H, CH(CH<sub>3</sub>)<sub>2</sub>), 1.27 (s, 36H, C(CH<sub>3</sub>)<sub>3</sub>), 1.29 (m, 4H, CH<sub>2</sub>CH<sub>2</sub>CH<sub>2</sub>CH<sub>3</sub>), 1.66 (m, 4H, CH<sub>2</sub>CH<sub>2</sub>CH<sub>2</sub>CH<sub>3</sub>), 1.71 (s, 6H, C(CH<sub>3</sub>)<sub>2</sub>), 1.91 (s, 6H, C(CH<sub>3</sub>)<sub>2</sub>), 2.72 (t,  $^3J_{\text{HH}}$  = 7.5 Hz, 4H, CH<sub>2</sub>CH<sub>2</sub>CH<sub>2</sub>CH<sub>3</sub>), 3.31 (sept.,  $^3J_{\text{HH}}$  = 6.7 Hz, 4H, CH(CH<sub>3</sub>)<sub>2</sub>), 3.65 (br., 2H, AlH), 3.78 (sept.,  $^3J_{\text{HH}}$  = 6.7 Hz, 4H, CH(CH<sub>3</sub>)<sub>2</sub>), 5.83 (s, 4H, NON-*o*-CH), 6.77 (s, 4H, NON-*p*-CH), 6.95 (br., 2H, AlCCHCH), 7.01-7.22 (m, 14H ArH), 7.36 (br., 2H, AlCCHCH), 8.18 (br., 2H, AlCCH);  $^{13}\text{C}\{^1\text{H}\}$  NMR (126 MHz, C<sub>6</sub>D<sub>6</sub>):  $\delta$  = 14.2

(CH<sub>2</sub>CH<sub>2</sub>CH<sub>2</sub>CH<sub>3</sub>), 22.8 (C(CH<sub>3</sub>)<sub>2</sub>), 23.0 (CH<sub>2</sub>CH<sub>2</sub>CH<sub>2</sub>CH<sub>3</sub>), 25.0, 25.1, 25.5, 26.0 (CH(CH<sub>3</sub>)<sub>2</sub>), 27.6, 28.8 (CH(CH<sub>3</sub>)<sub>2</sub>), 32.0 (C(CH<sub>3</sub>)<sub>3</sub>), 33.8 (C(CH<sub>3</sub>)<sub>2</sub>), 34.6 (CH<sub>2</sub>CH<sub>2</sub>CH<sub>2</sub>CH<sub>3</sub>), 35.1 (C(CH<sub>3</sub>)<sub>3</sub>), 36.8 (C(CH<sub>3</sub>)<sub>2</sub>), 36.9 (CH<sub>2</sub>CH<sub>2</sub>CH<sub>2</sub>CH<sub>3</sub>), 105.8, 109.4, 123.8, 125.9, 126.0, 126.7, 126.9, 131.6, 133.0, 139.2, 140.1, 142.0, 144.4, 146.3, 147.0, 149.0, 151.1 (Ar-C), 157.4 (Al-C); anal. calc. for C<sub>114</sub>H<sub>152</sub>Al<sub>2</sub>K<sub>2</sub>N<sub>4</sub>O<sub>2</sub>: C 78.57%, H 8.79%, N 3.22%, found: C 78.45%, H 8.87%, N 4.34%.

**Bromobenzene activation: synthesis of K<sub>2</sub>[(NON)AlBr(Ph)]<sub>2</sub>.** To a solution of K<sub>2</sub>[(NON)Al]<sub>2</sub> (0.200 mg, 0.136 mmol) in toluene (10 mL) was added bromobenzene (57 μl, 0.54 mmol). The mixture was stirred for 5 min and then left to stand overnight. The product K<sub>2</sub>[(NON)AlBr(Ph)]<sub>2</sub> was obtained as a white powder, isolated by filtration and dried *in vacuo*. Crystals suitable for X-ray diffraction were obtained from a saturated benzene solution (0.040 g, 17%; > 90% conversion by *in situ* <sup>1</sup>H NMR). <sup>1</sup>H NMR (400 MHz, d<sub>8</sub>-THF, 298 K): δ = 0.81 – 0.91 (m, 36H, CH(CH<sub>3</sub>)<sub>2</sub>), 1.11 (s, 36H, C(CH<sub>3</sub>)<sub>3</sub>), 1.15 (d, <sup>3</sup>J<sub>HH</sub> = 6.7 Hz, 12H, CH(CH<sub>3</sub>)<sub>2</sub>), 3.32 (sept, <sup>3</sup>J<sub>HH</sub> = 6.7 Hz, 4H, CH(CH<sub>3</sub>)<sub>2</sub>), 3.67 (sept, <sup>3</sup>J<sub>HH</sub> = 6.7 Hz, 4H, CH(CH<sub>3</sub>)<sub>2</sub>), 5.75 (d, <sup>4</sup>J<sub>HH</sub> = 1.9 Hz, 4H, XA-*o*-CH), 6.64 (d, <sup>4</sup>J<sub>HH</sub> = 1.9 Hz, 4H, XA-*p*-CH), 6.96 – 7.09 (m, 6H, Ph-ArH), 7.17 (s, 12H, Dipp-ArH), 7.60 (s, 4H, Ph-ArH); <sup>13</sup>C NMR (101 MHz, THF-d<sub>8</sub>): δ = 24.8 (XA-C(CH<sub>3</sub>)<sub>2</sub>), 24.3 (CH(CH<sub>3</sub>)<sub>2</sub>), 25.3 (CH(CH<sub>3</sub>)<sub>2</sub>), 26.7 (CH(CH<sub>3</sub>)<sub>2</sub>), 26.8 (CH(CH<sub>3</sub>)<sub>2</sub>), 28.3 (CH(CH<sub>3</sub>)<sub>2</sub>), 29.4 (CH(CH<sub>3</sub>)<sub>2</sub>), 32.2 (C(CH<sub>3</sub>)<sub>3</sub>), 34.6 (XA-C(CH<sub>3</sub>)<sub>2</sub>), 35.7 (C(CH<sub>3</sub>)<sub>3</sub>), 37.2 (XA-C(CH<sub>3</sub>)<sub>2</sub>), 106.9 (XA-(CH<sub>3</sub>)<sub>2</sub>CCCH), 111.5 (HCCN), 125.0 (Ph-CH), 125.4 (Dipp-CH), 126.8 (Ph-CH), 126.9 (Dipp-CH), 131.0 (XA-(CH<sub>3</sub>)<sub>2</sub>CC), 138.9 (CO), 138.6 (Ph-C), 139.5 (Ph-CH), 145.1 (NCCO), 145.6 (Dipp-*i*-C), 147.7 (CC(CH<sub>3</sub>)<sub>3</sub>), 147.9 (Dipp-*m*-C), 149.3 (Dipp-*m*-C).

# $^1\text{H}$ NMR spectra of new compounds

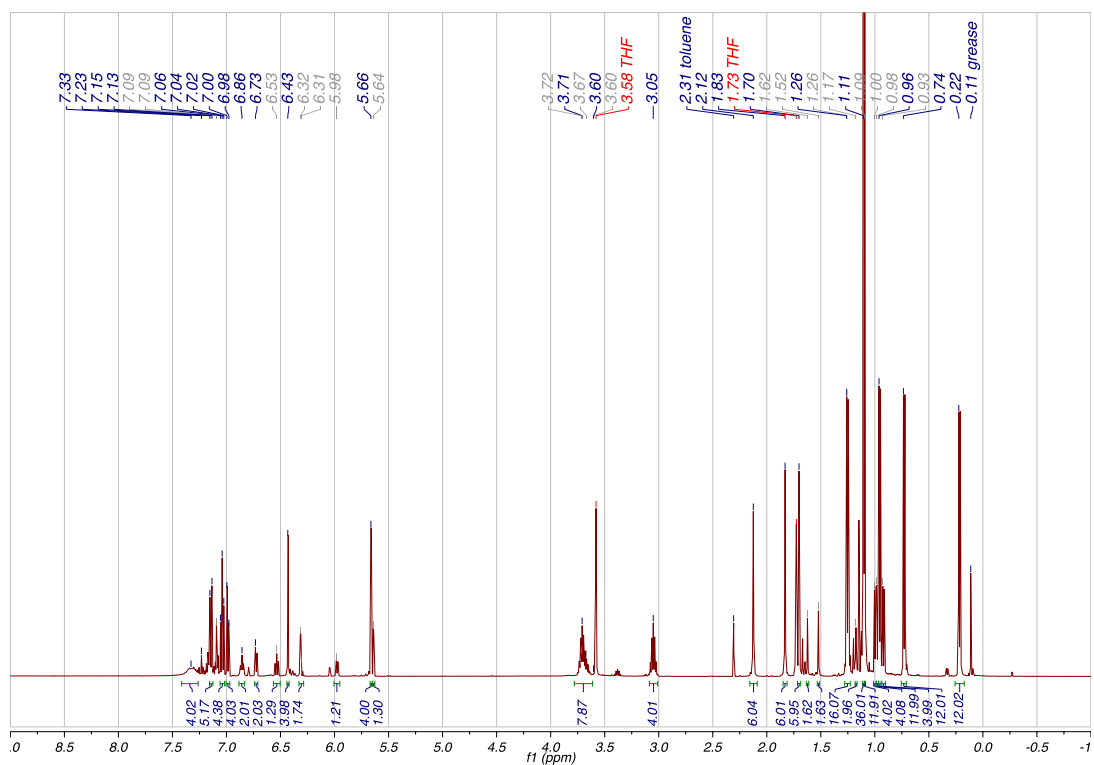

**Figure S1.**  $^1\text{H}$  NMR spectrum of the approx. 3:1 mixture of **3a** (peaks marked in blue) and **3b** (peaks marked in gray) in  $d_8$ -THF. Resonances corresponding to residual solvent signals and other impurities are marked.

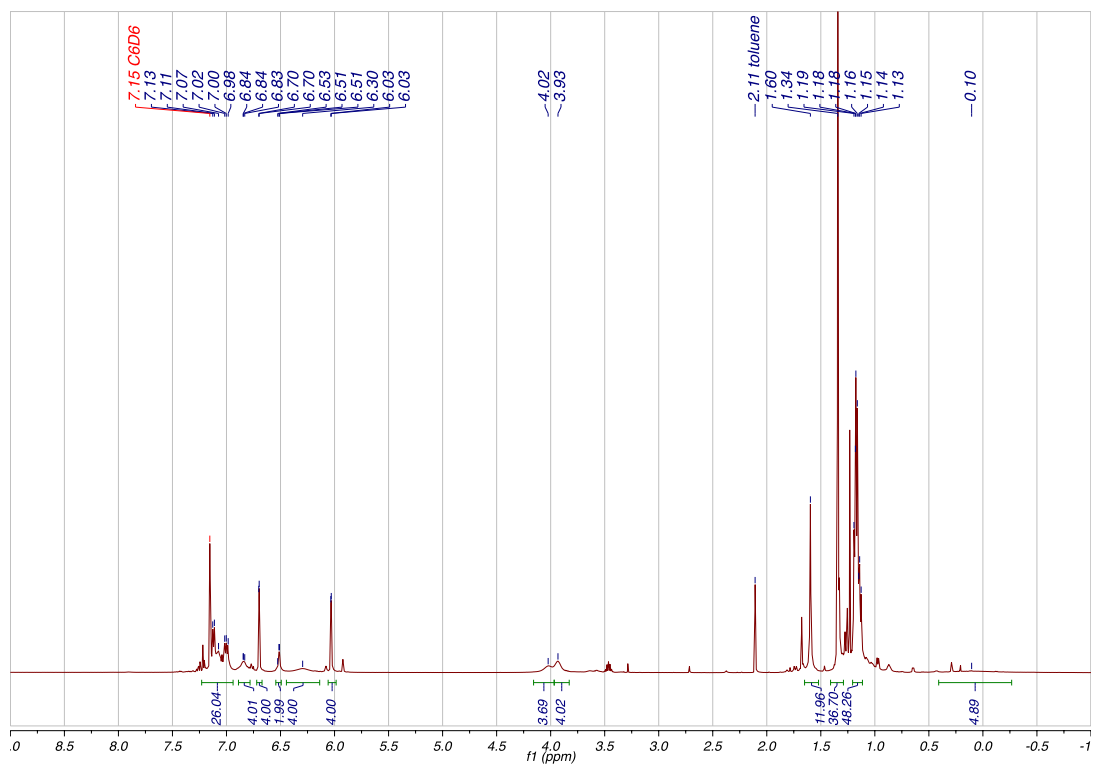

**Figure S2.**  $^1\text{H}$  NMR spectrum of **4** in  $\text{C}_6\text{D}_6$ . Resonances corresponding to residual solvent signals and other impurities are marked.



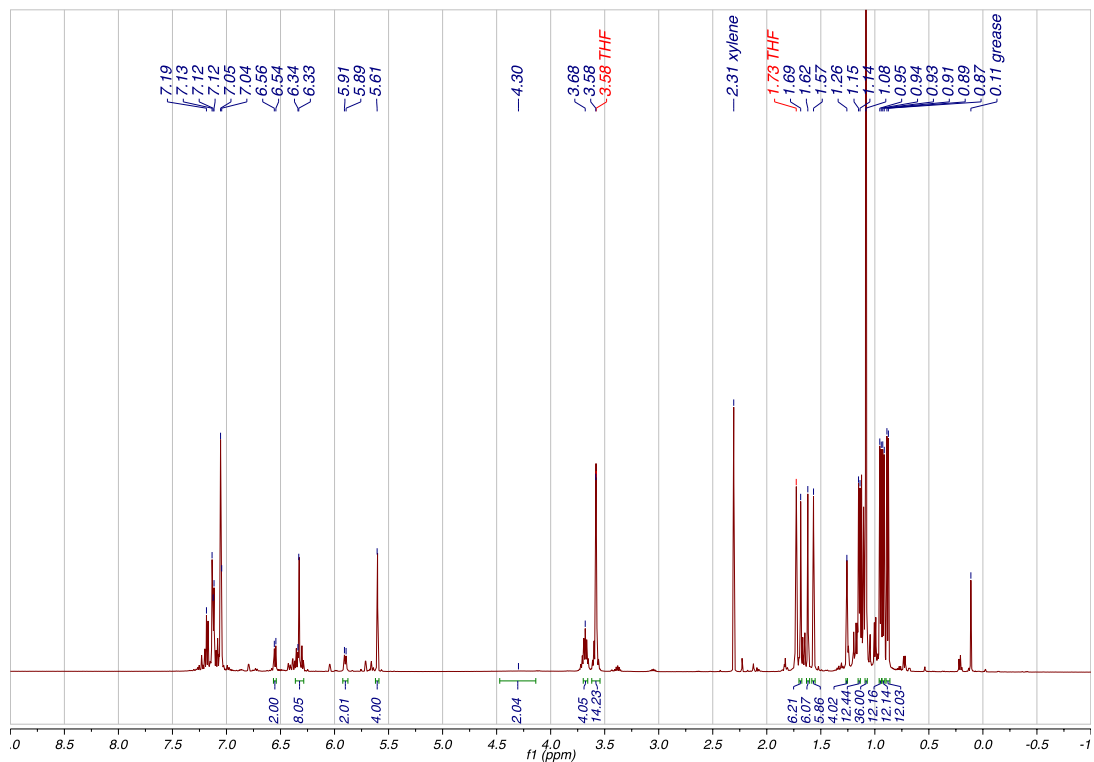

**Figure S3.**  $^1\text{H}$  NMR spectrum of **5** in  $d_8$ -THF. Resonances corresponding to residual solvent signals and other impurities are marked.

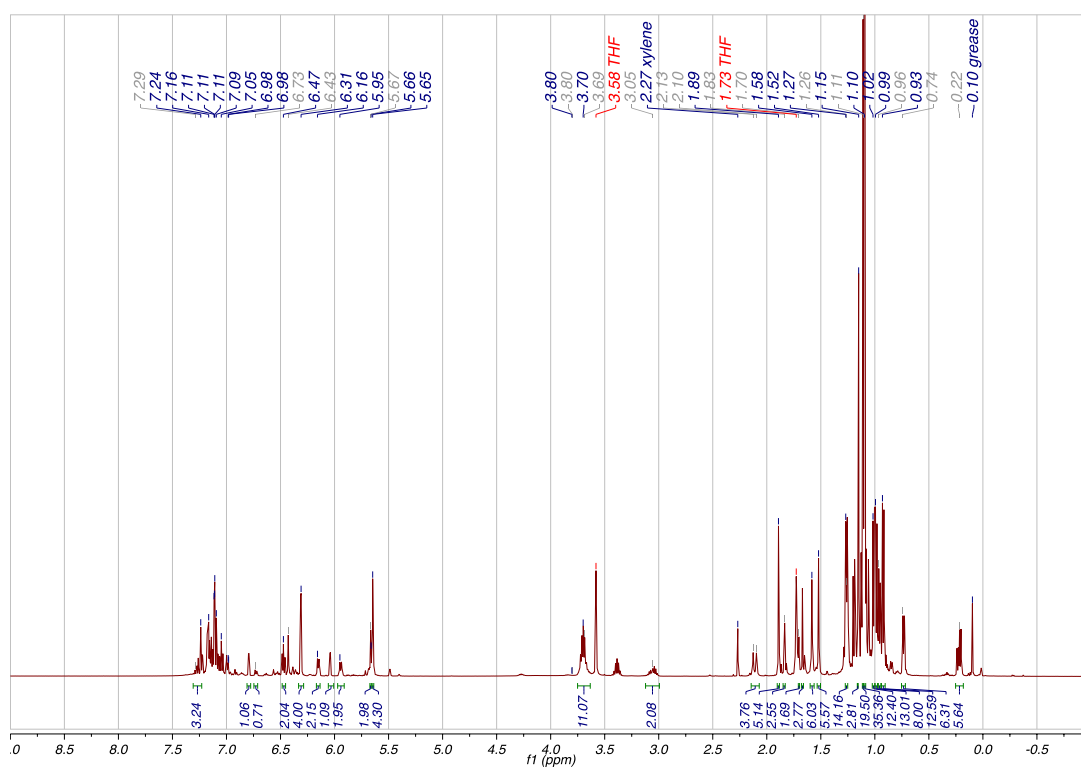

**Figure S4.**  $^1\text{H}$  NMR spectrum of an approximate 1:2 mixture of **6a** (peaks marked in grey) and **6b** (peaks marked in blue) in  $d_8$ -THF. Resonances corresponding to residual solvent signals and other impurities are marked.

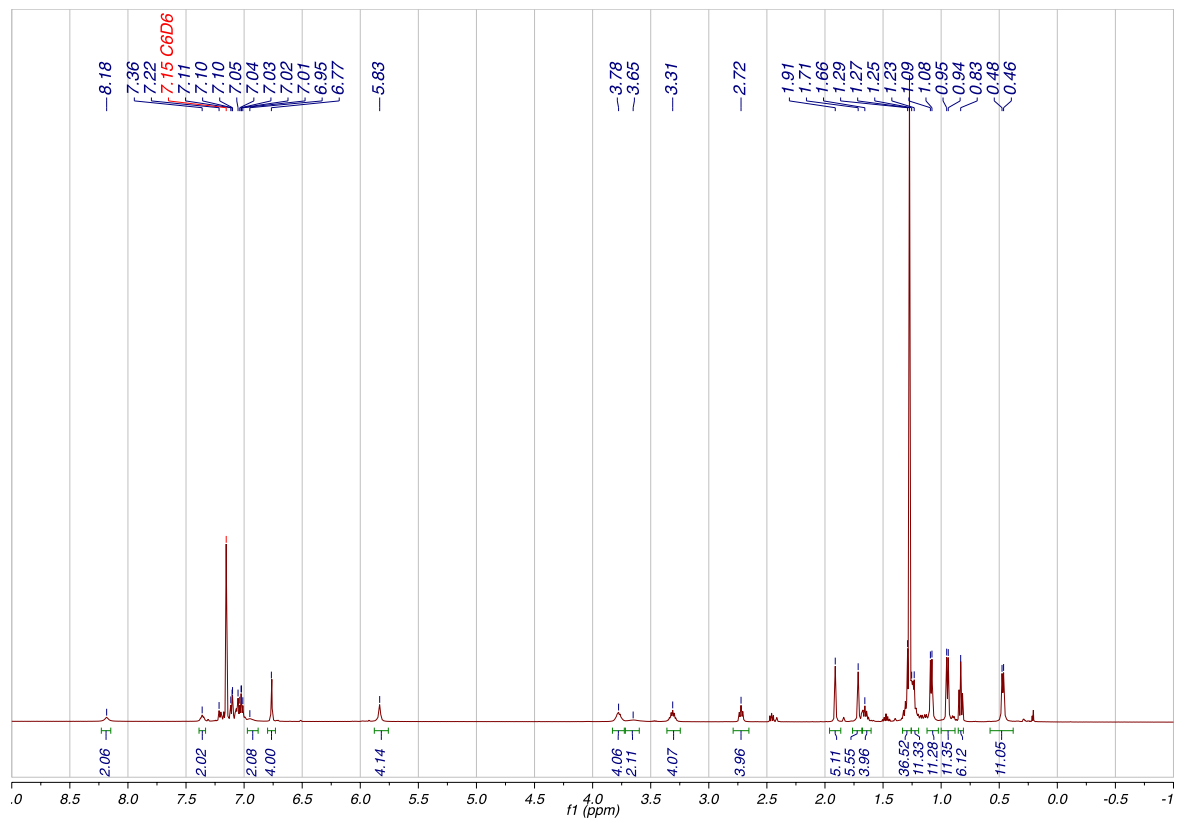

**Figure S5.**  $^1\text{H}$  NMR spectrum of **8**. Resonances corresponding to residual solvent signals and other impurities are marked.

### **X-ray crystallographic studies**

Single-crystal X-ray diffraction data were collected using an Oxford Diffraction Supernova dual-source diffractometer equipped with a 135 mm Atlas CCD area detector. Crystals were selected under Paratone-N oil, mounted on Micromount loops and quench-cooled using an Oxford Cryosystems open flow N<sub>2</sub> cooling device.<sup>S2</sup> Data were collected at 150 K using mirror monochromated Cu K<sub>α</sub> radiation ( $\lambda = 1.5418 \text{ \AA}$ ; Oxford Diffraction Supernova) and were processed using the CrysAlisPro package, including unit cell parameter refinement and inter-frame scaling (which was carried out using SCALE3 ABSPACK within CrysAlisPro).<sup>S3</sup> Equivalent reflections were merged and diffraction patterns processed with the CrysAlisPro suite. Structures were subsequently solved using ShelXT 2018<sup>S4</sup> and refined on F<sup>2</sup> using the ShelXL 2018 package<sup>S4</sup> and XSeed.<sup>S5</sup>

**Table S1.** Selected X-ray data collection and refinement parameters for **3**·4toluene, **4**·6toluene, **5**·*o*-xylene, **6**·2hexane, **8**·<sup>*n*</sup>BuPh, K<sub>2</sub>[(**NON**)AlH{CH<sub>2</sub>(C<sub>6</sub>H<sub>4</sub>Me-4)}][(**NON**)AlH<sub>2</sub>].hexane and K<sub>2</sub>[(**NON**)AlBr(Ph)]<sub>2</sub>·9benzene.

|                                                                    | <b>3</b> ·4toluene                                                                             | <b>4</b> ·6toluene                                                                             | <b>5</b> · <i>o</i> -xylene                                                                    | <b>6</b> ·2hexane                                                                              |
|--------------------------------------------------------------------|------------------------------------------------------------------------------------------------|------------------------------------------------------------------------------------------------|------------------------------------------------------------------------------------------------|------------------------------------------------------------------------------------------------|
| formula                                                            | C <sub>136</sub> H <sub>172</sub> Al <sub>2</sub> K <sub>2</sub> N <sub>4</sub> O <sub>2</sub> | C <sub>150</sub> H <sub>188</sub> Al <sub>2</sub> K <sub>2</sub> N <sub>4</sub> O <sub>4</sub> | C <sub>118</sub> H <sub>154</sub> Al <sub>2</sub> K <sub>2</sub> N <sub>4</sub> O <sub>2</sub> | C <sub>122</sub> H <sub>172</sub> Al <sub>2</sub> K <sub>2</sub> N <sub>4</sub> O <sub>2</sub> |
| Fw [g mol <sup>-1</sup> ]                                          | 2026.93                                                                                        | 2243.19                                                                                        | 1792.60                                                                                        | 1858.79                                                                                        |
| crystal system                                                     | triclinic                                                                                      | triclinic                                                                                      | monoclinic                                                                                     | triclinic                                                                                      |
| space group                                                        | <i>P</i> -1                                                                                    | <i>P</i> -1                                                                                    | <i>C</i> 2/ <i>c</i>                                                                           | <i>P</i> -1                                                                                    |
| <i>a</i> (Å)                                                       | 14.2315(5)                                                                                     | 15.4196(6)                                                                                     | 22.5942(3)                                                                                     | 14.0210(5)                                                                                     |
| <i>b</i> (Å)                                                       | 16.0087(7)                                                                                     | 15.9239(6)                                                                                     | 16.7146(2)                                                                                     | 14.3148(8)                                                                                     |
| <i>c</i> (Å)                                                       | 16.0903(7)                                                                                     | 16.0232(7)                                                                                     | 28.5312(5)                                                                                     | 16.2311(6)                                                                                     |
| $\alpha$ (°)                                                       | 111.398(4)                                                                                     | 106.877(4)                                                                                     | 90                                                                                             | 87.507(4)                                                                                      |
| $\beta$ (°)                                                        | 109.861(4)                                                                                     | 115.990(4)                                                                                     | 103.365(2)                                                                                     | 70.412(3)                                                                                      |
| $\gamma$ (°)                                                       | 101.192(3)                                                                                     | 91.894(3)                                                                                      | 90                                                                                             | 72.639(4)                                                                                      |
| <i>V</i> (Å <sup>3</sup> )                                         | 2990.9(2)                                                                                      | 3324.9(3)                                                                                      | 10483.1(3)                                                                                     | 2923.6(2)                                                                                      |
| <i>Z</i>                                                           | 1                                                                                              | 1                                                                                              | 4                                                                                              | 1                                                                                              |
| radiation, $\lambda$ (Å)                                           | Cu K $\alpha$ (1.5418)                                                                         | Cu K $\alpha$ (1.5418)                                                                         | Cu K $\alpha$ (1.5418)                                                                         | Cu K $\alpha$ (1.5418)                                                                         |
| <i>T</i> (K)                                                       | 150(2)                                                                                         | 150(2)                                                                                         | 150(2)                                                                                         | 150(2)                                                                                         |
| $\rho_{\text{calc}}$ (g cm <sup>-3</sup> )                         | 1.125                                                                                          | 1.120                                                                                          | 1.136                                                                                          | 1.056                                                                                          |
| $\mu$ (mm <sup>-1</sup> )                                          | 1.233                                                                                          | 1.166                                                                                          | 1.345                                                                                          | 1.218                                                                                          |
| reflections collected                                              | 12371                                                                                          | 13754                                                                                          | 10929                                                                                          | 12045                                                                                          |
| independent reflections                                            | 9938                                                                                           | 11433                                                                                          | 9077                                                                                           | 8574                                                                                           |
| parameters                                                         | 763                                                                                            | 913                                                                                            | 749                                                                                            | 749                                                                                            |
| <i>R</i> <sub>(int)</sub>                                          | 0.0458                                                                                         | 0.0426                                                                                         | 0.0346                                                                                         | 0.0414                                                                                         |
| R1 ( <i>I</i> ≥ 2σ( <i>I</i> )/all data)                           | 0.0642/ 0.0780                                                                                 | 0.0641/0.0741                                                                                  | 0.0485/0.0590                                                                                  | 0.0820/0.1068                                                                                  |
| wR2( <i>F</i> <sup>2</sup> ) ( <i>I</i> ≥ 2σ( <i>I</i> )/all data) | 0.1752/ 0.1943                                                                                 | 0.1782/0.1921                                                                                  | 0.1307/0.1392                                                                                  | 0.2417/0.2764                                                                                  |
| GOF                                                                | 1.054                                                                                          | 1.129                                                                                          | 1.072                                                                                          | 1.063                                                                                          |
| CCDC deposition number                                             | 2008537                                                                                        | 2008541                                                                                        | 2008539                                                                                        | 2008536                                                                                        |

**Table S1 (contd).** Selected X-ray data collection and refinement parameters for **3**·4toluene, **4**·6toluene, **5**·*o*-xylene, **6**·2hexane, **8**·<sup>*n*</sup>BuPh, K<sub>2</sub>[(**NON**)AlH{CH<sub>2</sub>(C<sub>6</sub>H<sub>4</sub>Me-4)}][(**NON**)AlH<sub>2</sub>]·hexane and K<sub>2</sub>[(**NON**)AlBr(Ph)]<sub>2</sub>·9Benzene

|                                                                    | <b>8</b> · <sup><i>n</i></sup> BuPh                                                            | K <sub>2</sub> [( <b>NON</b> )AlH{CH <sub>2</sub> (C <sub>6</sub> H <sub>4</sub> Me-4)}][( <b>NON</b> )AlH <sub>2</sub> ]·hexane | K <sub>2</sub> [( <b>NON</b> )AlBr(Ph)] <sub>2</sub> ·9Benzene                                                 |
|--------------------------------------------------------------------|------------------------------------------------------------------------------------------------|----------------------------------------------------------------------------------------------------------------------------------|----------------------------------------------------------------------------------------------------------------|
| formula                                                            | C <sub>124</sub> H <sub>166</sub> Al <sub>2</sub> K <sub>2</sub> N <sub>4</sub> O <sub>2</sub> | C <sub>108</sub> H <sub>150</sub> Al <sub>2</sub> K <sub>2</sub> N <sub>4</sub> O <sub>2</sub>                                   | C <sub>160</sub> H <sub>188</sub> Al <sub>2</sub> Br <sub>2</sub> K <sub>2</sub> N <sub>4</sub> O <sub>2</sub> |
| Fw [g mol <sup>-1</sup> ]                                          | 1876.76                                                                                        | 1668.47                                                                                                                          | 2491.11                                                                                                        |
| crystal system                                                     | monoclinic                                                                                     | monoclinic                                                                                                                       | triclinic                                                                                                      |
| space group                                                        | <i>C2/c</i>                                                                                    | <i>P2<sub>1</sub>/n</i>                                                                                                          | <i>P-1</i>                                                                                                     |
| <i>a</i> (Å)                                                       | 36.433(4)                                                                                      | 14.4832(4)                                                                                                                       | 13.6586(3)                                                                                                     |
| <i>b</i> (Å)                                                       | 27.8547(6)                                                                                     | 33.4706(10)                                                                                                                      | 14.1842(5)                                                                                                     |
| <i>c</i> (Å)                                                       | 19.911(2)                                                                                      | 20.8111(6)                                                                                                                       | 20.8356(6)                                                                                                     |
| $\alpha$ (°)                                                       | 90                                                                                             | 90                                                                                                                               | 94.109(2)                                                                                                      |
| $\beta$ (°)                                                        | 142.51(2)                                                                                      | 95.553(3)                                                                                                                        | 106.773(2)                                                                                                     |
| $\gamma$ (°)                                                       | 90                                                                                             | 90                                                                                                                               | 111.112(3)                                                                                                     |
| <i>V</i> (Å <sup>3</sup> )                                         | 12298(4)                                                                                       | 10041.1(5)                                                                                                                       | 3535.1(2)                                                                                                      |
| <i>Z</i>                                                           | 4                                                                                              | 4                                                                                                                                | 1                                                                                                              |
| radiation, $\lambda$ (Å)                                           | Cu K $\alpha$ (1.5418)                                                                         | Cu K $\alpha$ (1.5418)                                                                                                           | Cu K $\alpha$ (1.5418)                                                                                         |
| <i>T</i> (K)                                                       | 150(2)                                                                                         | 150(2)                                                                                                                           | 150(2)                                                                                                         |
| $\rho_{\text{calc}}$ (g cm <sup>-3</sup> )                         | 1.014                                                                                          | 1.104                                                                                                                            | 1.170                                                                                                          |
| $\mu$ (mm <sup>-1</sup> )                                          | 1.164                                                                                          | 1.368                                                                                                                            | 1.772                                                                                                          |
| reflections collected                                              | 12715                                                                                          | 20756                                                                                                                            | 14638                                                                                                          |
| independent reflections                                            | 8314                                                                                           | 15530                                                                                                                            | 12431                                                                                                          |
| parameters                                                         | 900                                                                                            | 1199                                                                                                                             | 850                                                                                                            |
| <i>R</i> <sub>(int)</sub>                                          | 0.0372                                                                                         | 0.0454                                                                                                                           | 0.0363                                                                                                         |
| R1 ( <i>I</i> ≥ 2σ( <i>I</i> )/all data)                           | 0.0900/0.1214                                                                                  | 0.0637/0.0867                                                                                                                    | 0.0469/0.0566                                                                                                  |
| wR2( <i>F</i> <sup>2</sup> ) ( <i>I</i> ≥ 2σ( <i>I</i> )/all data) | 0.2608/0.3082                                                                                  | 0.1742/0.1961                                                                                                                    | 0.1233/0.1326                                                                                                  |
| GOF                                                                | 1.184                                                                                          | 1.071                                                                                                                            | 1.075                                                                                                          |
| CCDC deposition number                                             | 2008538                                                                                        | 2008540                                                                                                                          | 2010397                                                                                                        |

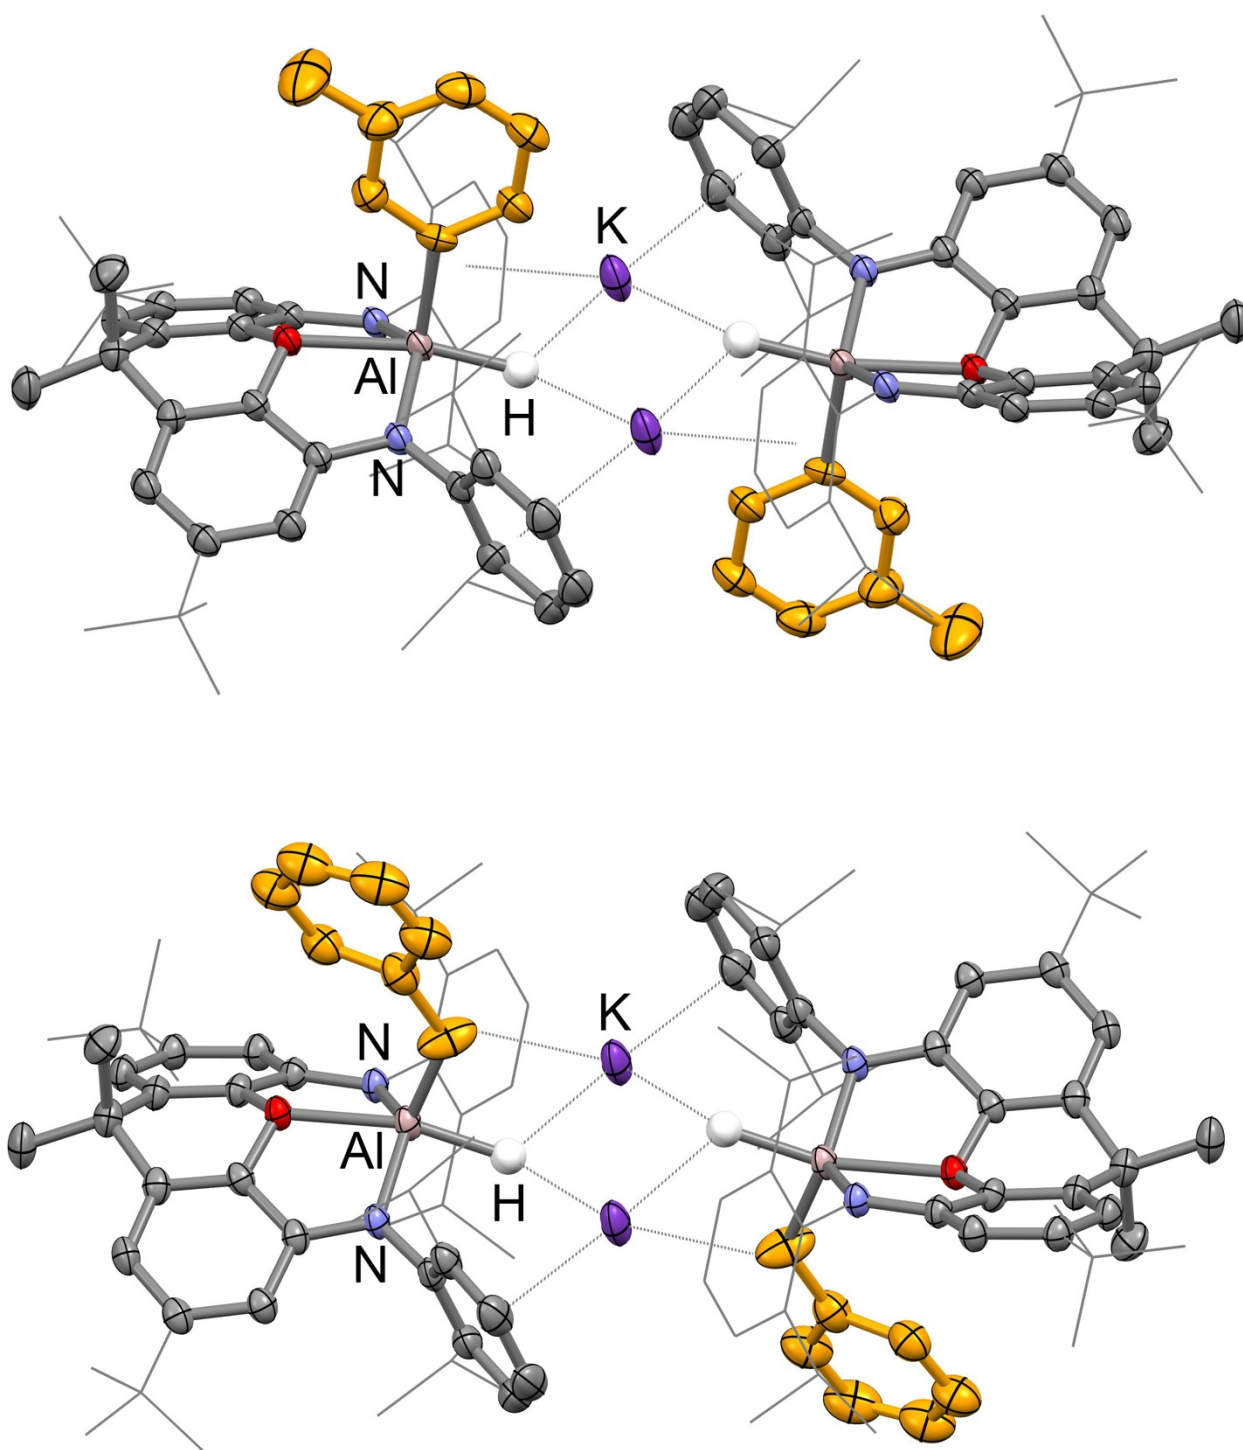

**Figure S6.** Molecular structures of **3a** (top) and **3b** (bottom) as determined by X-ray crystallography. Toluene solvate molecules and most hydrogen atoms omitted for clarity. Parts of the ligand are also shown in wireframe for clarity. Thermal ellipsoids set at the 50% probability level. Key bond lengths (Å) and angles (°): Al-N 1.9379(17), 1.9360(16), Al-O 2.1476(13), Al-C 2.047(5), 1.86(2), N-Al-N 129.16(7).

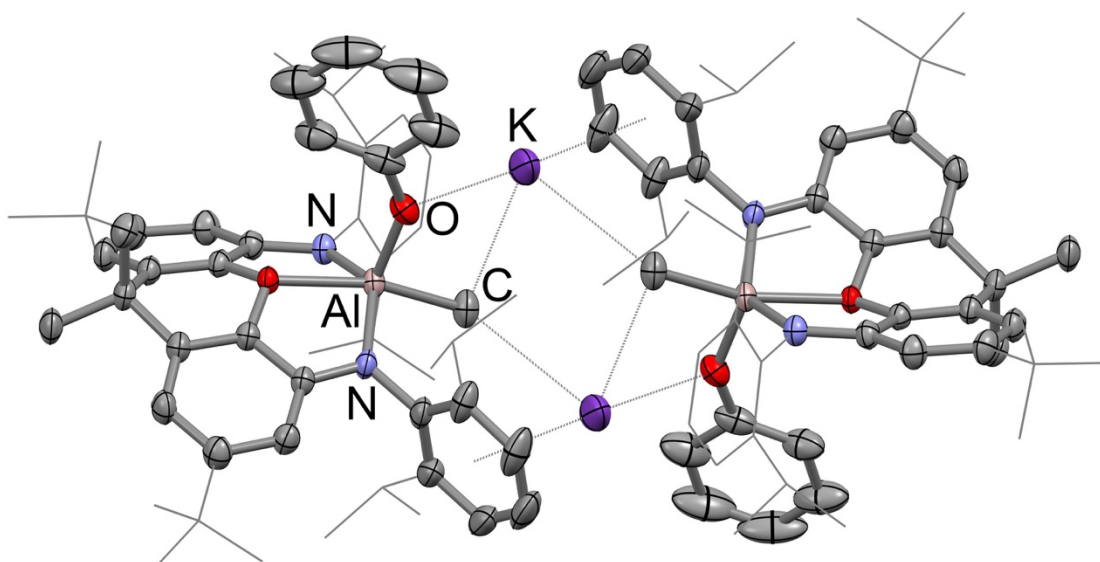

**Figure S7.** Molecular structure of **4** as determined by X-ray crystallography. Toluene solvate molecules and hydrogen atoms omitted for clarity. Parts of the ligand are also shown in wireframe for clarity. Thermal ellipsoids set at the 50% probability level. Key bond lengths (Å) and angles (°): Al-N 1.9393(15), 1.9379(14), Al-O(Ph) 1.7975(14), Al-O(NON) 2.1228(11), Al-C 2.0088(19), N-Al-N 134.64(6).

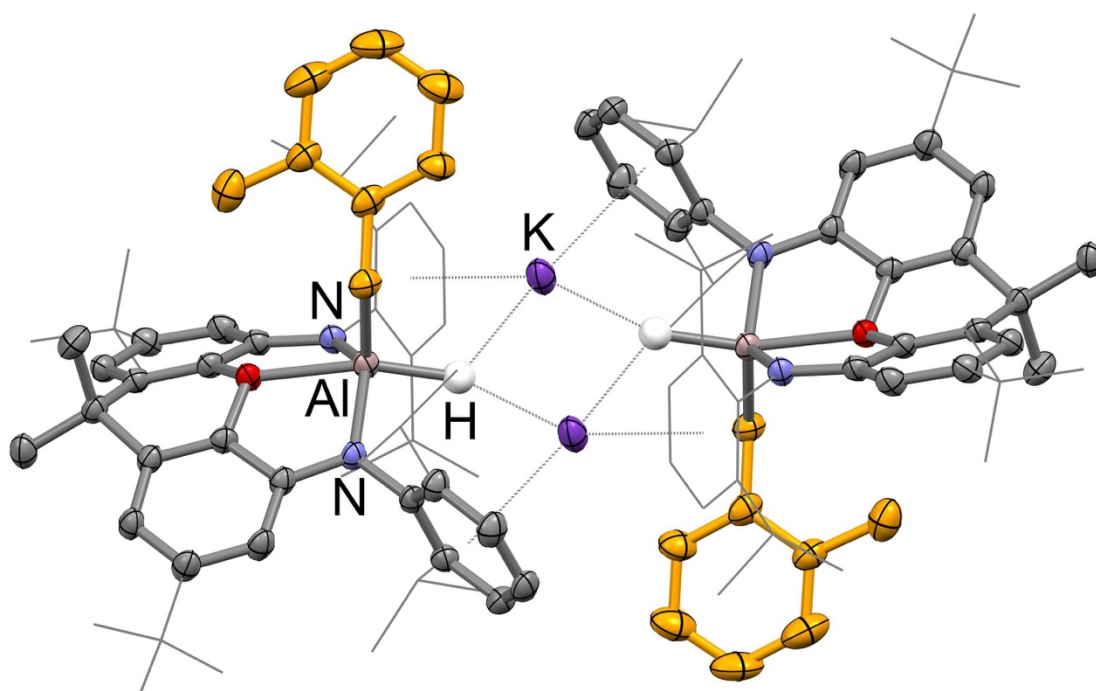

**Figure S8.** Molecular structure of **5** as determined by X-ray crystallography. *o*-Xylene solvate molecules and most hydrogen atoms omitted for clarity. Parts of the ligand are also shown in wireframe for clarity. Thermal ellipsoids set at the 50% probability level. Key bond lengths (Å) and angles (°): Al-N 1.9462(14), 1.9579(14), Al-O 2.1264(12), Al-C 2.080(3), N-Al-N 130.63(6).

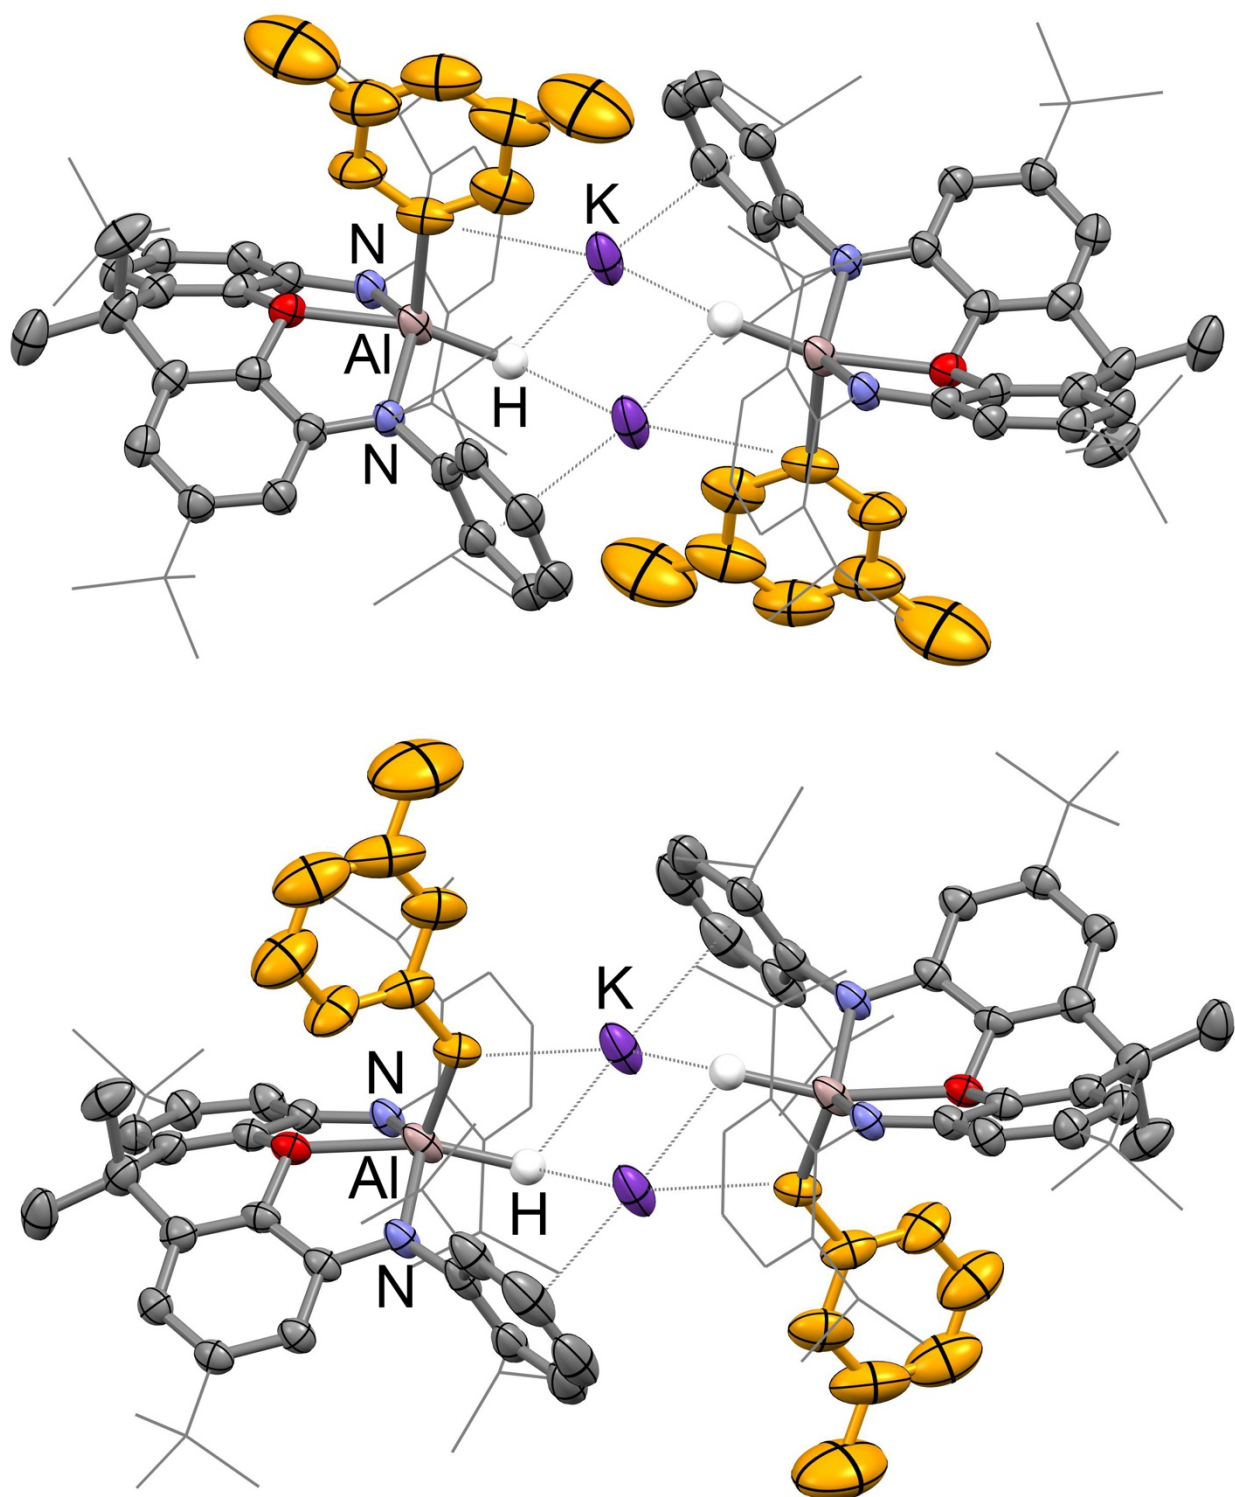

**Figure S9.** Molecular structures of **6a** (top) and **6b** (bottom) as determined by X-ray crystallography. Hexane solvate molecules and most hydrogen atoms omitted for clarity. Parts of the ligand are also shown in wireframe for clarity. Thermal ellipsoids set at the 50% probability level. Key bond lengths (Å) and angles (°): Al-N 1.935(2), 1.928(2), Al-O 2.153(2), Al-C 1.960(5), 2.259(9), N-Al-N 130.18(10).



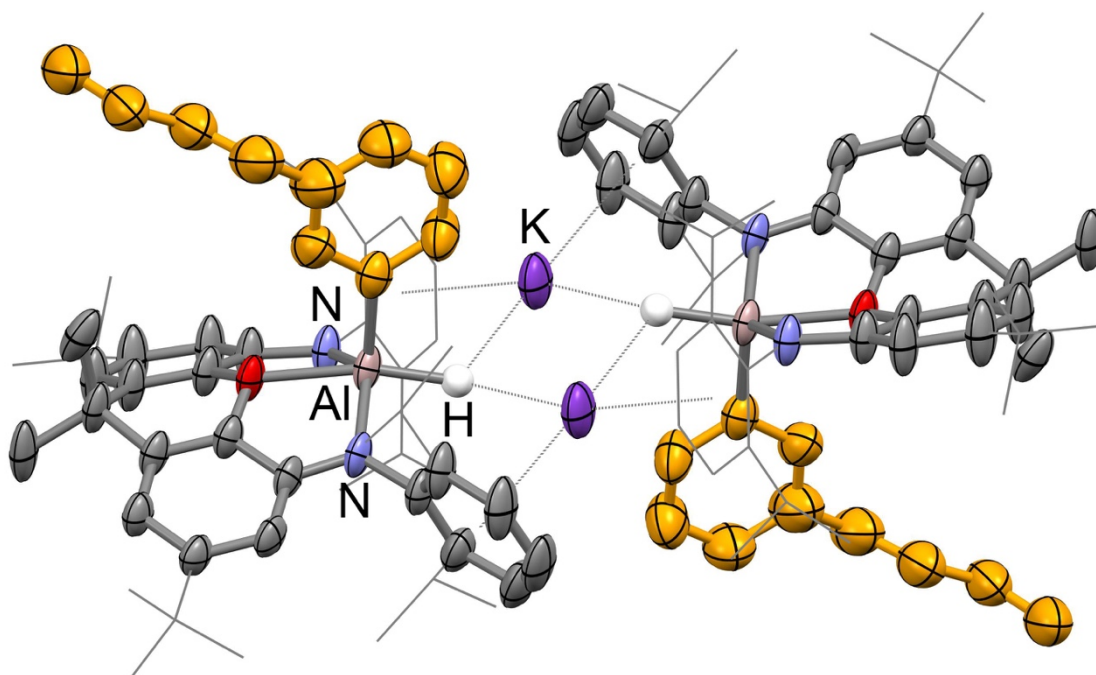

**Figure S10.** Molecular structure of **8** as determined by X-ray crystallography. *n*-Butylbenzene solvate molecules and most hydrogen atoms omitted for clarity. Parts of the ligand are also shown in wireframe for clarity. Thermal ellipsoids set at the 50% probability level. Key bond lengths (Å) and angles (°): Al-N 1.934(2), 1.940(3), Al-O 2.127(2), Al-C 2.005(4), N-Al-N 129.60(12).

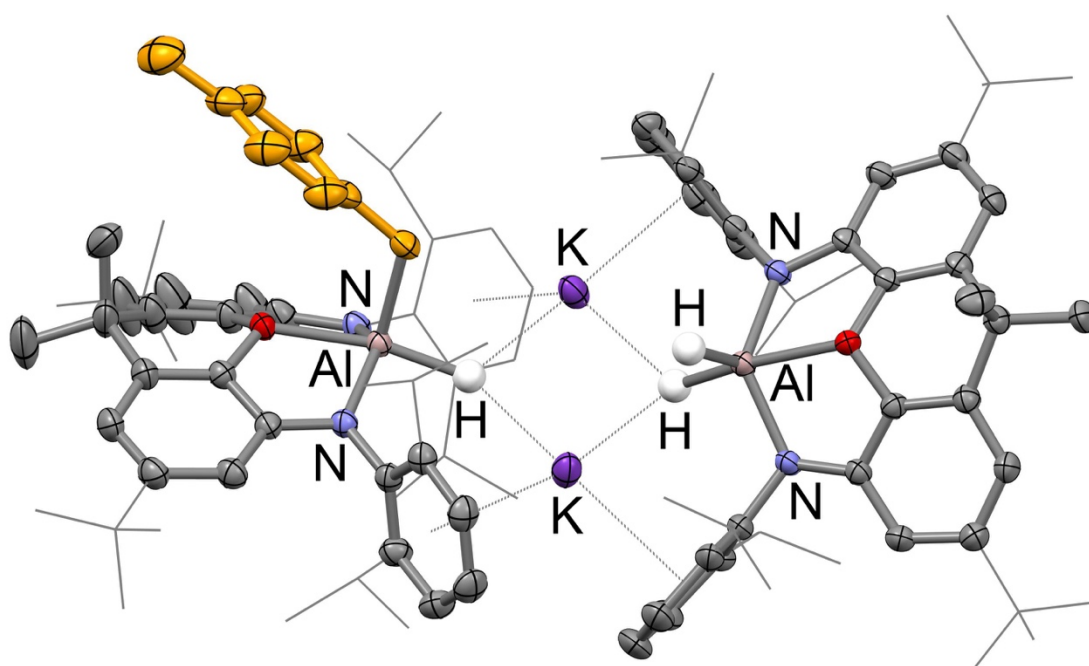

**Figure S11.** Molecular structure of  $K_2[[(NON)AlH\{CH_2(C_6H_4Me-4)\}][(NON)AlH_2]]$  as determined by X-ray crystallography. Hexane solvate molecules and most hydrogen atoms omitted for clarity. Parts of the ligand are also shown in wireframe for clarity. Thermal ellipsoids set at the 50% probability level. Key bond lengths (Å) and angles (°): Al-N 1.946(2), 1.933(2), 1.933(2), 1.9175(19), Al-O 2.0811(17), 2.1391(16), Al-C 2.029(2), N-Al-N 128.86(9), 131.82(9).

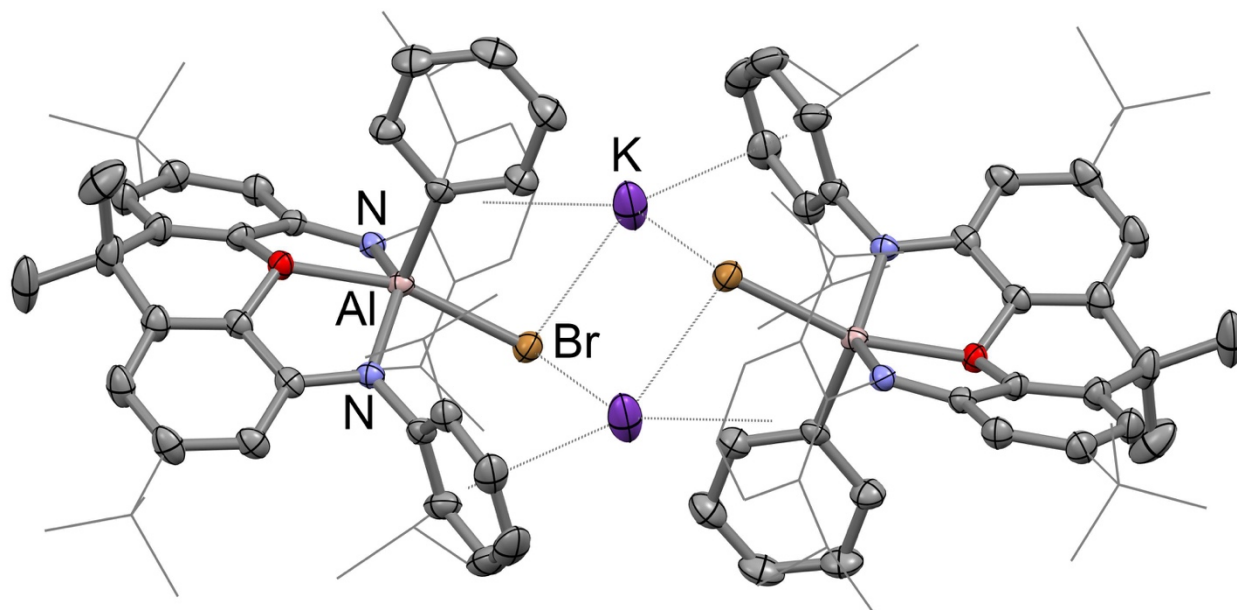

**Figure S12.** Molecular structure of  $K_2[(NON)AlBr(Ph)]_2$  as determined by X-ray crystallography. Benzene solvate molecules and hydrogen atoms omitted for clarity. Parts of the ligand are also shown in wireframe for clarity. Thermal ellipsoids set at the 50% probability level. Key bond lengths (Å) and angles (°): Al-Br 2.4533(6), Al-N 1.9420(16), 1.9324(16), Al-O 2.0256(14), Al-C 2.0088(19), N-Al-N 135.69(7).

### Computational details

The geometry optimizations were performed with the Gaussian16 (Revision C.01) programme<sup>S6</sup> using the PBE1PBE hybrid exchange functional<sup>S7</sup> and Def-TZVP basis set.<sup>S8</sup> In addition, Grimme's empirical dispersion correction with Becke-Johnson damping (GD3BJ)<sup>S9</sup> was used as well as an ultrafine integration grid. The calculations were performed to a simplified monomeric aluminyl anion where the NON-ligand backbone <sup>t</sup>Bu groups were replaced by Me groups to reduce computational cost. Full analytical frequency calculations were performed for the optimized structures to ensure the nature of the stationary points found (minima, no imaginary frequencies or a transition state with one imaginary frequency). The energies are Gibbs free energies (kJ mol<sup>-1</sup>) in the gas phase. The NBO analysis was performed using the NBO 7.0 programme.<sup>S10</sup>

### XYZ-coordinates for the optimized structures

#### Al anion 1'

95

|    |          |          |          |
|----|----------|----------|----------|
| C  | -3.69954 | -1.49511 | 1.31014  |
| C  | -2.82828 | -1.33636 | 0.21593  |
| C  | -2.97910 | -2.15168 | -0.92355 |
| C  | -4.00697 | -3.08820 | -0.95522 |
| C  | -4.87826 | -3.23388 | 0.11282  |
| C  | -4.71612 | -2.44270 | 1.23591  |
| N  | -1.78805 | -0.38881 | 0.26684  |
| Al | 0.01105  | -0.83803 | 1.24103  |
| C  | -2.05156 | -1.97757 | -2.10561 |
| C  | -1.83397 | -3.26311 | -2.89199 |
| C  | -3.55129 | -0.65959 | 2.56162  |
| C  | -3.22611 | -1.53025 | 3.77180  |
| N  | 1.76092  | -0.51715 | 0.16289  |
| C  | 2.09910  | 0.73264  | -0.26989 |
| C  | 3.25941  | 1.13640  | -0.94984 |
| C  | 3.42118  | 2.45269  | -1.38110 |
| C  | 2.42849  | 3.40337  | -1.15358 |
| C  | 1.26960  | 3.05290  | -0.45333 |
| C  | 1.17522  | 1.75311  | -0.02227 |
| O  | 0.05942  | 1.33438  | 0.67382  |
| C  | -1.11912 | 1.85843  | 0.17791  |
| C  | -1.17733 | 3.16893  | -0.22279 |
| C  | 0.10910  | 3.98382  | -0.10218 |
| C  | -2.40308 | 3.62671  | -0.71893 |
| C  | -3.48884 | 2.75724  | -0.79902 |
| C  | -3.35559 | 1.41466  | -0.44705 |
| C  | -2.12694 | 0.90186  | 0.00553  |
| C  | 4.68914  | 2.84324  | -2.08713 |
| C  | 0.27270  | 4.43327  | 1.36088  |
| C  | 0.08195  | 5.21292  | -0.99916 |
| C  | -4.82278 | 3.26291  | -1.27167 |
| C  | 2.81560  | -1.44356 | 0.27576  |
| C  | 3.80601  | -1.27235 | 1.26432  |
| C  | 4.84598  | -2.19195 | 1.35198  |
| C  | 4.91098  | -3.28444 | 0.50625  |
| C  | 3.91078  | -3.47575 | -0.43361 |
| C  | 2.85805  | -2.57571 | -0.56188 |
| C  | 3.73984  | -0.14077 | 2.26674  |
| C  | 4.98436  | 0.74120  | 2.22320  |
| C  | 1.77725  | -2.78170 | -1.60000 |
| C  | 1.95441  | -1.82431 | -2.77744 |
| C  | -2.53880 | -0.86840 | -3.03795 |
| C  | -4.78500 | 0.20509  | 2.81002  |
| C  | 1.67535  | -4.21801 | -2.09353 |
| C  | 3.48581  | -0.68357 | 3.67132  |
| H  | -4.19266 | 0.73701  | -0.57719 |
| H  | -2.51577 | 4.65262  | -1.04857 |
| H  | 2.56276  | 4.41246  | -1.52487 |
| H  | 4.02746  | 0.39984  | -1.16121 |
| H  | 1.20796  | 4.98707  | 1.48257  |
| H  | 0.29313  | 3.57199  | 2.03036  |

|   |          |          |          |
|---|----------|----------|----------|
| H | -0.56250 | 5.07639  | 1.65249  |
| H | -0.03321 | 4.93690  | -2.04937 |
| H | 1.00506  | 5.78618  | -0.88876 |
| H | -0.74416 | 5.87049  | -0.71989 |
| H | -4.12903 | -3.71934 | -1.82844 |
| H | -5.67424 | -3.97057 | 0.07132  |
| H | -5.38874 | -2.56548 | 2.07968  |
| H | -2.69859 | 0.00369  | 2.40498  |
| H | -4.02784 | -2.24734 | 3.97680  |
| H | -3.09241 | -0.90892 | 4.66301  |
| H | -2.29842 | -2.08053 | 3.59959  |
| H | -4.98639 | 0.85155  | 1.95296  |
| H | -4.63488 | 0.84113  | 3.68769  |
| H | -5.67301 | -0.40945 | 2.99114  |
| H | -1.08988 | -1.65185 | -1.69993 |
| H | -1.52971 | -4.08570 | -2.24095 |
| H | -1.05388 | -3.11306 | -3.64291 |
| H | -2.73871 | -3.56892 | -3.42671 |
| H | -3.51881 | -1.12361 | -3.45545 |
| H | -1.83848 | -0.73299 | -3.86827 |
| H | -2.63009 | 0.08198  | -2.51182 |
| H | 3.95112  | -4.34716 | -1.07645 |
| H | 5.72603  | -3.99622 | 0.58940  |
| H | 5.60959  | -2.05677 | 2.11228  |
| H | 2.88320  | 0.48093  | 2.00580  |
| H | 5.88269  | 0.18188  | 2.50357  |
| H | 4.88285  | 1.57835  | 2.92041  |
| H | 5.13396  | 1.15039  | 1.22166  |
| H | 2.55623  | -1.25734 | 3.69094  |
| H | 3.39691  | 0.13865  | 4.38869  |
| H | 4.30264  | -1.33393 | 4.00057  |
| H | 0.82961  | -2.52814 | -1.11266 |
| H | 1.96379  | -0.78685 | -2.44378 |
| H | 1.13930  | -1.94418 | -3.49802 |
| H | 2.89815  | -2.02763 | -3.29429 |
| H | 2.56129  | -4.51252 | -2.66518 |
| H | 0.81399  | -4.32436 | -2.75514 |
| H | 1.55567  | -4.91969 | -1.26426 |
| H | 4.99509  | 2.07854  | -2.80596 |
| H | 4.56849  | 3.78655  | -2.62483 |
| H | 5.51414  | 2.96934  | -1.37754 |
| H | -4.71852 | 4.20301  | -1.81852 |
| H | -5.31148 | 2.53874  | -1.92882 |
| H | -5.49848 | 3.44352  | -0.42864 |

#### Benzene

12

|   |          |          |          |
|---|----------|----------|----------|
| C | -0.35130 | -1.34335 | 0.00000  |
| C | 0.98777  | -0.97587 | 0.00001  |
| C | 1.33904  | 0.36744  | -0.00001 |
| C | 0.35125  | 1.34336  | 0.00000  |
| C | -0.98773 | 0.97591  | 0.00001  |
| C | -1.33903 | -0.36749 | -0.00001 |

|                                                |          |          |          |   |          |          |          |
|------------------------------------------------|----------|----------|----------|---|----------|----------|----------|
| H                                              | -0.62555 | -2.39245 | -0.00001 | O | -0.05514 | 1.30650  | -1.07910 |
| H                                              | 1.75910  | -1.73803 | -0.00000 | C | 1.03004  | 2.04702  | -0.59868 |
| H                                              | 2.38472  | 0.65449  | -0.00003 | C | 1.04637  | 3.40611  | -0.79379 |
| H                                              | 0.62564  | 2.39243  | -0.00000 | C | -0.17570 | 4.00536  | -1.49016 |
| H                                              | -1.75915 | 1.73797  | 0.00001  | C | -1.38958 | 3.27295  | -0.90717 |
| H                                              | -2.38474 | -0.65441 | -0.00000 | C | -1.26725 | 1.91582  | -0.74097 |
| <b>nButyl benzene</b>                          |          |          |          | C | 2.09254  | 4.11085  | -0.19608 |
| 24                                             |          |          |          | C | 3.01263  | 3.44519  | 0.61568  |
| C                                              | 2.64576  | 1.19898  | -0.27607 | C | 2.85242  | 2.09263  | 0.90816  |
| C                                              | 1.35213  | 1.19579  | 0.22520  | C | 1.80047  | 1.36155  | 0.34343  |
| C                                              | 0.68591  | -0.00001 | 0.48285  | C | -2.21022 | 1.05590  | -0.17527 |
| C                                              | 1.35214  | -1.19579 | 0.22518  | C | -3.41097 | 1.66494  | 0.20638  |
| C                                              | 2.64576  | -1.19897 | -0.27608 | C | -3.60655 | 3.03344  | 0.03232  |
| C                                              | 3.29752  | 0.00001  | -0.52927 | C | -2.60198 | 3.83789  | -0.50951 |
| H                                              | 3.14854  | 2.14105  | -0.46583 | N | 1.36423  | 0.10758  | 0.68273  |
| H                                              | 0.84929  | 2.13733  | 0.42505  | C | 1.61911  | -0.34896 | 2.00348  |
| H                                              | 0.84931  | -2.13735 | 0.42502  | C | 2.40205  | -1.49951 | 2.21364  |
| H                                              | 3.14855  | -2.14103 | -0.46586 | C | 2.55746  | -1.97360 | 3.51236  |
| H                                              | 4.30957  | 0.00002  | -0.91811 | C | 1.96487  | -1.33406 | 4.58943  |
| C                                              | -0.73252 | -0.00002 | 0.97376  | C | 1.21224  | -0.19379 | 4.37544  |
| H                                              | -0.90325 | 0.87818  | 1.60546  | C | 1.02414  | 0.31858  | 3.09417  |
| H                                              | -0.90325 | -0.87824 | 1.60543  | C | 4.16408  | 4.19834  | 1.21607  |
| C                                              | -1.74689 | 0.00000  | -0.16852 | C | -0.10155 | 3.72284  | -3.00044 |
| H                                              | -1.57033 | 0.87540  | -0.80435 | C | -0.26805 | 5.50687  | -1.26814 |
| H                                              | -1.57033 | -0.87538 | -0.80437 | C | -4.92353 | 3.64110  | 0.42301  |
| C                                              | -3.18857 | -0.00001 | 0.31432  | C | 3.09942  | -2.17828 | 1.05965  |
| H                                              | -3.35496 | -0.87574 | 0.95257  | C | 4.43085  | -1.48923 | 0.76328  |
| H                                              | -3.35496 | 0.87571  | 0.95260  | C | 0.18203  | 1.57011  | 2.93187  |
| C                                              | -4.19318 | 0.00001  | -0.82622 | C | 0.80098  | 2.75218  | 3.67549  |
| H                                              | -5.22146 | 0.00001  | -0.45690 | C | -1.26566 | 1.36228  | 3.36402  |
| H                                              | -4.06750 | 0.88194  | -1.46081 | C | 3.29013  | -3.67545 | 1.24657  |
| H                                              | -4.06750 | -0.88190 | -1.46084 | C | -4.99891 | 0.27063  | -2.54288 |
| <b>nButyl benzene activation TS, ortho C-H</b> |          |          |          | C | -2.40439 | -2.02047 | 3.56094  |
| 119                                            |          |          |          | H | 0.56439  | -2.39097 | -0.08817 |
| C                                              | 1.72094  | -2.37534 | -2.02006 | H | 3.49267  | 1.61321  | 1.64053  |
| C                                              | 0.40172  | -2.22911 | -1.36344 | H | 2.17715  | 5.18295  | -0.32617 |
| C                                              | -0.53569 | -3.29113 | -1.75414 | H | -2.76979 | 4.90376  | -0.60750 |
| C                                              | -0.04187 | -4.53838 | -2.04538 | H | -4.18776 | 1.05552  | 0.65520  |
| C                                              | 1.33501  | -4.77388 | -2.19835 | H | -0.99775 | 4.10332  | -3.49745 |
| C                                              | 2.16607  | -3.64452 | -2.30837 | H | -0.02497 | 2.65356  | -3.19963 |
| Al                                             | -0.01598 | -0.63173 | -0.41227 | H | 0.77565  | 4.21444  | -3.42916 |
| N                                              | -1.84236 | -0.26178 | -0.03587 | H | -0.32632 | 5.75274  | -0.20588 |
| C                                              | -2.85928 | -1.24501 | 0.03166  | H | -1.15173 | 5.90952  | -1.76787 |
| C                                              | -2.88273 | -2.17084 | 1.09041  | H | 0.60442  | 6.00779  | -1.69322 |
| C                                              | -3.89643 | -3.12400 | 1.13069  | H | 3.14734  | -2.86733 | 3.67931  |
| C                                              | -4.87008 | -3.18609 | 0.15247  | H | 2.09034  | -1.72582 | 5.59371  |
| C                                              | -4.81077 | -2.30509 | -0.91411 | H | 0.74537  | 0.30697  | 5.21801  |
| C                                              | -3.80835 | -1.34818 | -1.01024 | H | 0.15699  | 1.83275  | 1.87586  |
| C                                              | -1.81895 | -2.20734 | 2.16330  | H | -1.74440 | 0.59152  | 2.76123  |
| C                                              | -1.01087 | -3.50233 | 2.08917  | H | -1.83275 | 2.28789  | 3.22982  |
| C                                              | -3.72280 | -0.52512 | -2.28150 | H | -1.33475 | 1.06743  | 4.41513  |
| C                                              | -3.37608 | -1.41226 | -3.47695 | H | 0.23068  | 3.66426  | 3.47711  |
|                                                |          |          |          | H | 1.83068  | 2.91983  | 3.35540  |
|                                                |          |          |          | H | 0.80121  | 2.58334  | 4.75668  |

|                                               |          |          |          |   |          |          |          |
|-----------------------------------------------|----------|----------|----------|---|----------|----------|----------|
| H                                             | 2.47431  | -2.06224 | 0.17469  | C | 2.14931  | 0.00216  | -1.48959 |
| H                                             | 4.04084  | -3.90951 | 2.00983  | C | 2.29834  | 1.04711  | -0.57623 |
| H                                             | 3.61335  | -4.11579 | 0.30104  | C | 3.59957  | 1.54754  | -0.45692 |
| H                                             | 2.34889  | -4.15853 | 1.51721  | H | 3.78634  | 2.35864  | 0.23838  |
| H                                             | 4.28628  | -0.43156 | 0.53125  | C | 4.64583  | 1.00643  | -1.20070 |
| H                                             | 4.91232  | -1.95875 | -0.09918 | C | 4.42712  | -0.06328 | -2.07115 |
| H                                             | 5.10971  | -1.56242 | 1.61990  | H | 5.26350  | -0.48418 | -2.61622 |
| H                                             | -3.91074 | -3.83843 | 1.94715  | C | 3.14505  | -0.59221 | -2.22437 |
| H                                             | -5.65413 | -3.93417 | 0.20361  | C | 2.73436  | -1.77524 | -3.10789 |
| H                                             | -5.54025 | -2.38492 | -1.71383 | C | 1.77663  | -2.61349 | -2.26071 |
| H                                             | -2.90888 | 0.18999  | -2.17391 | C | 1.83602  | -3.99354 | -2.06018 |
| H                                             | -5.85331 | -0.39175 | -2.71104 | H | 2.51294  | -4.60456 | -2.64484 |
| H                                             | -4.88182 | 0.89336  | -3.43458 | C | 1.05921  | -4.59164 | -1.06626 |
| H                                             | -5.23529 | 0.92472  | -1.70116 | C | 0.28138  | -3.81544 | -0.21064 |
| H                                             | -2.43602 | -1.94507 | -3.31661 | H | -0.21473 | -4.27085 | 0.63937  |
| H                                             | -3.27701 | -0.80295 | -4.38085 | C | 0.21519  | -2.42584 | -0.37077 |
| H                                             | -4.15835 | -2.15578 | -3.65728 | C | 0.87325  | -1.91857 | -1.49426 |
| H                                             | -1.13061 | -1.37763 | 1.98354  | C | 1.99889  | -1.23842 | -4.34759 |
| H                                             | -3.01436 | -1.11677 | 3.62480  | H | 2.66558  | -0.59714 | -4.92999 |
| H                                             | -1.59884 | -1.94317 | 4.29624  | H | 1.67112  | -2.07027 | -4.97650 |
| H                                             | -3.03495 | -2.87072 | 3.83817  | H | 1.12112  | -0.65615 | -4.06608 |
| H                                             | -1.63199 | -4.36147 | 2.36318  | C | 3.94128  | -2.58421 | -3.55659 |
| H                                             | -0.16533 | -3.45502 | 2.78047  | H | 4.49734  | -2.98151 | -2.70504 |
| H                                             | -0.62160 | -3.67366 | 1.08296  | H | 3.62604  | -3.41935 | -4.18581 |
| H                                             | -0.74380 | -5.35283 | -2.22048 | H | 4.61324  | -1.96226 | -4.15188 |
| H                                             | 1.70564  | -5.75742 | -2.46473 | C | 1.11592  | 2.75114  | 0.63151  |
| H                                             | 3.16776  | -3.77951 | -2.71471 | C | 1.28753  | 3.85753  | -0.23094 |
| H                                             | -5.30212 | 3.20468  | 1.35034  | C | 1.24833  | 5.13896  | 0.30401  |
| H                                             | -4.83644 | 4.72048  | 0.56441  | H | 1.38028  | 5.98930  | -0.35749 |
| H                                             | -5.67954 | 3.46795  | -0.35035 | C | 1.00016  | 5.35458  | 1.64897  |
| H                                             | 3.95345  | 5.26881  | 1.26934  | H | 0.96188  | 6.36373  | 2.04531  |
| H                                             | 4.38744  | 3.84202  | 2.22468  | C | 0.76680  | 4.26966  | 2.47181  |
| H                                             | 5.07116  | 4.06879  | 0.61681  | H | 0.53188  | 4.43187  | 3.51858  |
| H                                             | -1.60721 | -3.13844 | -1.68094 | C | 0.81449  | 2.96499  | 1.98879  |
| C                                             | 2.49246  | -1.12524 | -2.34051 | C | 0.49627  | 1.83496  | 2.94088  |
| H                                             | 1.81981  | -0.43886 | -2.88319 | H | 0.59844  | 0.89408  | 2.39412  |
| H                                             | 2.76251  | -0.57924 | -1.42286 | C | -0.94494 | 1.92517  | 3.44030  |
| C                                             | 3.76778  | -1.28907 | -3.14904 | H | -1.07921 | 2.80386  | 4.07956  |
| H                                             | 4.45807  | -1.95151 | -2.61250 | H | -1.65069 | 1.99827  | 2.60981  |
| H                                             | 3.54258  | -1.78943 | -4.09850 | H | -1.19441 | 1.03488  | 4.02361  |
| C                                             | 4.46331  | 0.03719  | -3.41560 | C | 1.46854  | 1.78646  | 4.11728  |
| H                                             | 3.77908  | 0.69937  | -3.95966 | H | 1.27857  | 0.89630  | 4.72314  |
| H                                             | 4.66360  | 0.53447  | -2.45903 | H | 2.50702  | 1.75643  | 3.78051  |
| C                                             | 5.75946  | -0.11203 | -4.19624 | H | 1.34971  | 2.66480  | 4.75894  |
| H                                             | 5.58055  | -0.58379 | -5.16753 | C | 1.42181  | 3.71460  | -1.73526 |
| H                                             | 6.24074  | 0.85367  | -4.37764 | H | 1.45890  | 2.65374  | -1.97775 |
| H                                             | 6.47131  | -0.74238 | -3.65413 | C | 0.19778  | 4.28862  | -2.44831 |
|                                               |          |          |          | H | 0.09547  | 5.36112  | -2.25736 |
|                                               |          |          |          | H | 0.29332  | 4.14805  | -3.52957 |
|                                               |          |          |          | H | -0.72094 | 3.79835  | -2.11897 |
|                                               |          |          |          | C | 2.70583  | 4.35050  | -2.26234 |
|                                               |          |          |          | H | 3.58584  | 3.92631  | -1.77492 |
|                                               |          |          |          | H | 2.79905  | 4.18101  | -3.33901 |
|                                               |          |          |          | H | 2.71078  | 5.43172  | -2.09503 |
| <b>nButyl benzene activation TS, meta C-H</b> |          |          |          |   |          |          |          |
| 119                                           |          |          |          |   |          |          |          |
| Al                                            | -0.33572 | 0.30247  | -0.11912 |   |          |          |          |
| O                                             | 0.85409  | -0.52074 | -1.56914 |   |          |          |          |
| N                                             | 1.17198  | 1.43527  | 0.11067  |   |          |          |          |
| N                                             | -0.29928 | -1.50094 | 0.49952  |   |          |          |          |











|   |          |          |          |   |          |          |          |
|---|----------|----------|----------|---|----------|----------|----------|
| C | 1.75458  | 2.67595  | 3.24159  | H | 2.03960  | 1.95172  | -1.67202 |
| H | 1.63622  | 3.26447  | 4.14350  | C | 3.60568  | 3.40317  | -1.63763 |
| C | 3.01856  | 2.54590  | 2.67164  | H | 4.59907  | 3.57600  | -2.06551 |
| C | 3.21503  | 1.75924  | 1.53551  | H | 2.96066  | 4.23469  | -1.93749 |
| H | 4.21472  | 1.62624  | 1.13643  | H | 3.69364  | 3.41728  | -0.54976 |
| C | 2.14237  | 1.08642  | 0.93281  | C | 2.82581  | 2.10308  | -3.63933 |
| C | 0.89133  | 1.32885  | 1.51062  | H | 2.43620  | 1.14939  | -3.99712 |
| C | -1.55197 | 3.17081  | 2.36560  | H | 2.10452  | 2.87802  | -3.91254 |
| H | -2.59953 | 3.20193  | 2.67858  | H | 3.76373  | 2.31255  | -4.16419 |
| H | -1.10020 | 4.15291  | 2.53087  | C | 3.70534  | -2.10091 | 0.66802  |
| H | -1.52190 | 2.95798  | 1.29566  | H | 2.61403  | -2.06689 | 0.62862  |
| C | -0.85228 | 2.43340  | 4.64247  | C | 4.12573  | -1.67445 | 2.07412  |
| H | -0.32343 | 1.69013  | 5.24252  | H | 5.21732  | -1.67364 | 2.16455  |
| H | -0.40639 | 3.41263  | 4.82893  | H | 3.76484  | -0.67239 | 2.30928  |
| H | -1.88954 | 2.48028  | 4.98074  | H | 3.72226  | -2.36655 | 2.81999  |
| C | -1.58738 | -2.71939 | -0.48597 | C | 4.13634  | -3.53453 | 0.39339  |
| C | -2.81671 | -2.51098 | -1.14307 | H | 3.66603  | -4.20694 | 1.11564  |
| C | -3.48101 | -3.60222 | -1.69541 | H | 3.84236  | -3.85001 | -0.60998 |
| H | -4.43091 | -3.44378 | -2.19669 | H | 5.21863  | -3.66327 | 0.49278  |
| C | -2.94661 | -4.87557 | -1.63043 | C | -1.04510 | 1.72875  | -1.81623 |
| H | -3.47490 | -5.71558 | -2.07015 | H | -1.13261 | 1.99987  | -0.76712 |
| C | -1.72068 | -5.06880 | -1.01419 | C | -0.32205 | 0.58450  | -2.15747 |
| H | -1.29657 | -6.06544 | -0.98357 | C | -0.24219 | 0.29713  | -3.52678 |
| C | -1.02723 | -4.01088 | -0.43542 | H | 0.30490  | -0.58597 | -3.84931 |
| C | 0.29712  | -4.23666 | 0.25935  | C | -0.84455 | 1.10407  | -4.48359 |
| H | 0.92425  | -3.38134 | -0.00638 | H | -0.75935 | 0.85643  | -5.53812 |
| C | 1.01637  | -5.49389 | -0.20930 | C | -1.57082 | 2.22401  | -4.09627 |
| H | 0.48438  | -6.40382 | 0.08701  | H | -2.05629 | 2.84786  | -4.84251 |
| H | 1.13444  | -5.50354 | -1.29560 | C | -1.68217 | 2.54603  | -2.74814 |
| H | 2.01089  | -5.54188 | 0.23837  | C | -2.50938 | 3.70569  | -2.26739 |
| C | 0.13711  | -4.25071 | 1.77852  | H | -2.78975 | 4.34557  | -3.11185 |
| H | 1.11308  | -4.35396 | 2.26403  | H | -1.90957 | 4.32563  | -1.58942 |
| H | -0.32516 | -3.33174 | 2.13911  | C | -3.76541 | 3.25006  | -1.52792 |
| H | -0.48849 | -5.09316 | 2.09249  | H | -3.47723 | 2.53554  | -0.74902 |
| C | -3.42905 | -1.13320 | -1.28476 | H | -4.40780 | 2.69315  | -2.22052 |
| H | -2.71434 | -0.41505 | -0.88191 | C | -4.55173 | 4.38731  | -0.89746 |
| C | -3.65070 | -0.77282 | -2.75080 | H | -3.89349 | 4.94079  | -0.21697 |
| H | -4.39796 | -1.42452 | -3.21481 | H | -4.85495 | 5.09967  | -1.67469 |
| H | -4.00316 | 0.25840  | -2.83573 | C | -5.77562 | 3.90061  | -0.13799 |
| H | -2.72243 | -0.85056 | -3.31715 | H | -6.32880 | 4.72747  | 0.31597  |
| C | -4.73255 | -1.00007 | -0.49943 | H | -5.48775 | 3.21120  | 0.66095  |
| H | -4.57824 | -1.20709 | 0.56084  | H | -6.46085 | 3.36349  | -0.80067 |
| H | -5.12778 | 0.01628  | -0.59369 | H | 1.20933  | -1.87904 | -1.61791 |
| H | -5.49208 | -1.69126 | -0.87967 | C | -3.98979 | -1.79915 | 4.06749  |
| C | 3.41139  | -0.01053 | -0.72508 | H | -3.77876 | -2.86422 | 4.19627  |
| C | 4.19882  | -1.12207 | -0.37262 | H | -4.06778 | -1.34608 | 5.05832  |
| C | 5.44338  | -1.28335 | -0.97162 | H | -4.97082 | -1.71980 | 3.58694  |
| H | 6.05768  | -2.13687 | -0.70688 | C | 4.19397  | 3.25967  | 3.27746  |
| C | 5.91319  | -0.37191 | -1.90398 | H | 4.48515  | 4.12566  | 2.67353  |
| H | 6.88889  | -0.51098 | -2.35870 | H | 3.96318  | 3.61890  | 4.28289  |
| C | 5.12404  | 0.70645  | -2.26219 | H | 5.06611  | 2.60340  | 3.34242  |
| H | 5.48363  | 1.41077  | -3.00604 |   |          |          |          |
| C | 3.86834  | 0.90098  | -1.69337 |   |          |          |          |
| C | 3.02332  | 2.07823  | -2.12663 |   |          |          |          |

nButyl benzene activation product, para  
119

|    |          |          |          |   |          |          |          |
|----|----------|----------|----------|---|----------|----------|----------|
| C  | -1.96265 | -1.35858 | 1.01792  | H | 4.17318  | -0.32367 | 4.16774  |
| C  | -1.47985 | -1.16743 | -0.28183 | H | 4.13828  | -2.34979 | 0.39003  |
| C  | -2.23317 | -1.76025 | -1.30194 | H | 1.05471  | -0.52912 | 5.19127  |
| C  | -3.39064 | -2.48671 | -1.05011 | H | -0.07358 | -0.25443 | 3.85515  |
| C  | -3.85741 | -2.65221 | 0.24976  | H | -0.00515 | 0.90291  | 5.19384  |
| C  | -3.11989 | -2.07954 | 1.28312  | H | 3.37201  | 2.29252  | 4.36077  |
| Al | 0.13554  | -0.09722 | -0.79742 | H | 3.05465  | 0.96134  | 5.48899  |
| N  | 1.77659  | -1.14435 | -0.44950 | H | 2.00984  | 2.37570  | 5.49327  |
| C  | 2.13921  | -2.21347 | -1.30284 | H | -3.98298 | 3.67245  | -2.39991 |
| C  | 2.85650  | -1.96584 | -2.48973 | H | -2.64887 | 4.77295  | -4.15988 |
| C  | 3.22349  | -3.04197 | -3.29120 | H | -0.20928 | 4.44799  | -4.23293 |
| C  | 2.90113  | -4.34364 | -2.94215 | H | 1.57135  | 2.06812  | -2.04301 |
| C  | 2.18019  | -4.57854 | -1.78615 | H | 1.46019  | 2.22199  | -4.52643 |
| C  | 1.78034  | -3.53252 | -0.95966 | H | 3.01170  | 2.77221  | -3.87407 |
| C  | 3.23445  | -0.55076 | -2.86699 | H | 1.83517  | 3.95337  | -4.43530 |
| C  | 3.49899  | -0.37453 | -4.35576 | H | 3.13094  | 3.95207  | -1.66508 |
| C  | 0.96360  | -3.84630 | 0.27620  | H | 1.68973  | 4.10119  | -0.64869 |
| C  | -0.31352 | -4.60611 | -0.07132 | H | 1.85339  | 5.10303  | -2.09884 |
| O  | 0.69701  | 0.32261  | 1.32099  | H | -2.49512 | 1.40956  | 0.16750  |
| C  | 0.52334  | 1.62987  | 1.71460  | H | -4.98909 | 1.82340  | -1.54059 |
| C  | 0.99176  | 2.06978  | 2.92590  | H | -4.76086 | 0.64220  | -0.24122 |
| C  | 1.67807  | 1.04254  | 3.82412  | H | -3.82389 | 0.49895  | -1.72631 |
| C  | 2.45415  | 0.08324  | 2.92296  | H | -2.96915 | 3.66974  | 1.07061  |
| C  | 1.89026  | -0.23805 | 1.71447  | H | -4.33289 | 2.57631  | 1.34603  |
| C  | 0.78573  | 3.42154  | 3.22613  | H | -4.41734 | 3.78387  | 0.05445  |
| C  | 0.14702  | 4.25173  | 2.30853  | H | 3.77206  | -2.86192 | -4.20815 |
| C  | -0.25872 | 3.76505  | 1.06539  | H | 3.20156  | -5.16969 | -3.57891 |
| C  | -0.04334 | 2.42496  | 0.71220  | H | 1.90833  | -5.59544 | -1.52023 |
| C  | 2.44752  | -1.06894 | 0.73736  | H | 0.66257  | -2.89598 | 0.71814  |
| C  | 3.65614  | -1.68182 | 1.09569  | H | 2.09481  | -5.58918 | 0.91699  |
| C  | 4.25723  | -1.41703 | 2.32660  | H | 1.17779  | -4.80038 | 2.20839  |
| C  | 3.67398  | -0.53093 | 3.22872  | H | 2.66948  | -4.06109 | 1.60901  |
| N  | -0.25714 | 1.81460  | -0.48675 | H | -0.90416 | -4.06232 | -0.80873 |
| C  | -0.90227 | 2.58543  | -1.48043 | H | -0.93243 | -4.72901 | 0.82188  |
| C  | -2.29918 | 2.74653  | -1.45207 | H | -0.09220 | -5.60235 | -0.46773 |
| C  | -2.90529 | 3.54222  | -2.42039 | H | 2.36948  | 0.06725  | -2.61194 |
| C  | -2.16065 | 4.15837  | -3.41019 | H | 4.23264  | -0.11363 | -0.98194 |
| C  | -0.78738 | 3.97500  | -3.44681 | H | 4.64681  | 0.99171  | -2.29918 |
| C  | -0.14052 | 3.19525  | -2.49439 | H | 5.32007  | -0.64742 | -2.27201 |
| C  | -0.11552 | 5.69104  | 2.65109  | H | 4.39934  | -0.90813 | -4.67747 |
| C  | 0.59358  | 0.23893  | 4.56404  | H | 3.65231  | 0.68220  | -4.58334 |
| C  | 2.58649  | 1.71053  | 4.84706  | H | 2.65676  | -0.72977 | -4.95451 |
| C  | 5.54378  | -2.11031 | 2.67604  | H | -1.89981 | -1.64628 | -2.33131 |
| C  | -3.14974 | 2.07485  | -0.39677 | H | -3.94518 | -2.93003 | -1.87473 |
| C  | -3.74958 | 3.08925  | 0.57522  | H | -3.46121 | -2.20093 | 2.30932  |
| C  | 1.36175  | 3.03057  | -2.51522 | H | -1.41957 | -0.92844 | 1.85556  |
| C  | 2.04791  | 4.11023  | -1.67895 | H | 6.24800  | -2.08526 | 1.84003  |
| C  | 1.94215  | 2.99297  | -3.92144 | H | 6.02366  | -1.64248 | 3.53859  |
| C  | -4.24492 | 1.21318  | -1.01821 | H | 5.37110  | -3.16359 | 2.92191  |
| C  | 1.77909  | -4.61799 | 1.31249  | H | 0.47519  | 6.00632  | 3.51417  |
| C  | 4.42700  | -0.05228 | -2.05279 | H | 0.12850  | 6.34918  | 1.81279  |
| H  | 0.17940  | -0.07089 | -2.42608 | H | -1.17115 | 5.85372  | 2.89341  |
| H  | -0.70424 | 4.43754  | 0.34043  | C | -5.15197 | -3.36164 | 0.52407  |
| H  | 1.12451  | 3.83295  | 4.16939  | H | -5.10205 | -3.86293 | 1.49779  |

|                         |          |          |          |   |          |          |          |
|-------------------------|----------|----------|----------|---|----------|----------|----------|
| H                       | -5.31026 | -4.14575 | -0.22541 | C | 0.15696  | 4.14607  | 2.03738  |
| C                       | -6.34853 | -2.41266 | 0.51277  | C | -0.01510 | 5.48189  | -0.06098 |
| H                       | -6.18477 | -1.62599 | 1.25870  | C | 4.70389  | 3.56133  | -1.50982 |
| H                       | -6.38756 | -1.90242 | -0.45668 | C | -3.59038 | -1.20418 | 1.85272  |
| C                       | -7.67395 | -3.10691 | 0.78228  | C | -4.73264 | -0.28633 | 2.28403  |
| H                       | -7.82705 | -3.89391 | 0.03388  | C | -2.02865 | -1.16380 | -2.97436 |
| H                       | -7.62312 | -3.61751 | 1.75165  | C | -2.52953 | 0.12666  | -3.62214 |
| C                       | -8.85706 | -2.15216 | 0.76898  | C | -1.73370 | -2.21427 | -4.03536 |
| H                       | -8.94488 | -1.65138 | -0.19961 | C | -3.47353 | -2.39946 | 2.79367  |
| H                       | -9.80004 | -2.67044 | 0.96381  | C | 4.77300  | 0.38270  | 1.97232  |
| H                       | -8.74054 | -1.37379 | 1.52877  | C | 2.18105  | -0.56052 | -3.64811 |
| <b>product, benzene</b> |          |          |          | H | -0.07385 | -2.37382 | -0.52110 |
| 107                     |          |          |          | H | -4.24302 | 0.99079  | -0.77190 |
| C                       | 0.03007  | -0.33044 | 3.21242  | H | -2.61407 | 4.91653  | -0.21991 |
| C                       | 0.05358  | -1.29209 | 2.19464  | H | 2.52196  | 4.89252  | -0.63615 |
| C                       | 0.11107  | -2.62752 | 2.61329  | H | 4.07001  | 0.95086  | -1.30366 |
| C                       | 0.14427  | -2.98877 | 3.95572  | H | 1.07659  | 4.67029  | 2.31201  |
| C                       | 0.11923  | -2.00770 | 4.93722  | H | 0.19065  | 3.14625  | 2.47352  |
| C                       | 0.06125  | -0.67183 | 4.55955  | H | -0.69847 | 4.67761  | 2.46363  |
| Al                      | -0.01222 | -0.92457 | 0.22072  | H | -0.10789 | 5.47107  | -1.14888 |
| N                       | 1.76233  | -0.31451 | -0.40473 | H | 0.89283  | 6.02685  | 0.20589  |
| C                       | 2.82873  | -1.23324 | -0.55354 | H | -0.85928 | 6.03594  | 0.35488  |
| C                       | 2.95649  | -1.99231 | -1.73342 | H | -5.45917 | -2.84863 | 0.81864  |
| C                       | 4.03370  | -2.86335 | -1.86006 | H | -5.72602 | -3.61582 | -1.51155 |
| C                       | 4.97832  | -2.99279 | -0.85460 | H | -4.13395 | -2.87317 | -3.23679 |
| C                       | 4.83708  | -2.25931 | 0.30864  | H | -1.09026 | -0.93144 | -2.46550 |
| C                       | 3.76888  | -1.38482 | 0.48555  | H | -1.37849 | -3.14288 | -3.58353 |
| C                       | 1.94529  | -1.84020 | -2.84786 | H | -0.96073 | -1.84627 | -4.71511 |
| C                       | 1.88896  | -3.04379 | -3.77835 | H | -2.61479 | -2.44088 | -4.64379 |
| C                       | 3.64662  | -0.63417 | 1.79485  | H | -1.80644 | 0.48954  | -4.35942 |
| C                       | 3.59559  | -1.58729 | 2.98564  | H | -2.68078 | 0.91086  | -2.87932 |
| O                       | 0.01453  | 1.28703  | 0.51067  | H | -3.48214 | -0.04576 | -4.13458 |
| C                       | -1.16758 | 1.92178  | 0.20450  | H | -2.65825 | -0.64236 | 1.92468  |
| C                       | -1.24317 | 3.29032  | 0.16577  | H | -4.40710 | -2.97021 | 2.83644  |
| C                       | 0.02590  | 4.06941  | 0.50562  | H | -3.23616 | -2.06076 | 3.80586  |
| C                       | 1.21493  | 3.27872  | -0.03844 | H | -2.67395 | -3.06881 | 2.47478  |
| C                       | 1.13938  | 1.91036  | 0.02158  | H | -4.78477 | 0.60153  | 1.65110  |
| C                       | -2.48315 | 3.84188  | -0.17769 | H | -4.58621 | 0.04111  | 3.31781  |
| C                       | -3.55940 | 3.01004  | -0.47589 | H | -5.69547 | -0.80549 | 2.22855  |
| C                       | -3.41114 | 1.62263  | -0.48031 | H | 4.13875  | -3.45451 | -2.76202 |
| C                       | -2.17739 | 1.03013  | -0.17380 | H | 5.81433  | -3.67435 | -0.97564 |
| C                       | 2.10078  | 1.00809  | -0.44436 | H | 5.56404  | -2.37330 | 1.10690  |
| C                       | 3.27579  | 1.59230  | -0.93710 | H | 2.69980  | -0.09361 | 1.77432  |
| C                       | 3.41953  | 2.97904  | -0.99083 | H | 5.74724  | -0.11587 | 2.01171  |
| C                       | 2.39508  | 3.81907  | -0.56167 | H | 4.64097  | 0.93447  | 2.90802  |
| N                       | -1.81877 | -0.28197 | -0.25333 | H | 4.78769  | 1.10304  | 1.15271  |
| C                       | -2.84727 | -1.19483 | -0.58123 | H | 2.79347  | -2.31628 | 2.86947  |
| C                       | -3.73646 | -1.64092 | 0.41228  | H | 3.40366  | -1.02920 | 3.90619  |
| C                       | -4.76777 | -2.50524 | 0.05519  | H | 4.54078  | -2.12594 | 3.10849  |
| C                       | -4.91839 | -2.93965 | -1.24955 | H | 0.97133  | -1.75801 | -2.35805 |
| C                       | -4.02195 | -2.51737 | -2.21857 | H | 2.16303  | 0.32031  | -3.00623 |
| C                       | -2.98247 | -1.64803 | -1.90656 | H | 1.40594  | -0.44041 | -4.41209 |
| C                       | -4.90209 | 3.60277  | -0.79799 | H | 3.15229  | -0.59469 | -4.15337 |
|                         |          |          |          | H | 2.80796  | -3.15174 | -4.36373 |

|                                     |          |          |          |   |          |          |          |
|-------------------------------------|----------|----------|----------|---|----------|----------|----------|
| H                                   | 1.06713  | -2.92718 | -4.48744 | C | 2.97227  | 1.93667  | -1.32502 |
| H                                   | 1.72563  | -3.96991 | -3.22182 | C | 2.35213  | 3.32074  | -1.51808 |
| H                                   | 0.13003  | -3.41016 | 1.85779  | C | 1.15062  | 3.37576  | -0.56813 |
| H                                   | 0.18964  | -4.03712 | 4.23746  | C | 0.36388  | 2.25241  | -0.50603 |
| H                                   | 0.14497  | -2.28026 | 5.98788  | C | 4.32227  | 1.65291  | -1.11149 |
| H                                   | 0.04101  | 0.10532  | 5.31874  | C | 4.71462  | 0.37654  | -0.70454 |
| H                                   | -0.01543 | 0.72240  | 2.94649  | C | 3.76397  | -0.60281 | -0.42645 |
| H                                   | 5.02503  | 3.06009  | -2.42692 | C | 2.40015  | -0.34409 | -0.60824 |
| H                                   | 4.59678  | 4.62693  | -1.72470 | C | -0.73671 | 2.05031  | 0.32853  |
| H                                   | 5.51248  | 3.44872  | -0.77962 | C | -1.07545 | 3.14294  | 1.13484  |
| H                                   | -4.81988 | 4.66798  | -1.02566 | C | -0.33434 | 4.32186  | 1.09154  |
| H                                   | -5.35940 | 3.10514  | -1.65744 | C | 0.77857  | 4.43833  | 0.25623  |
| H                                   | -5.59414 | 3.49532  | 0.04406  | N | 1.33436  | -1.09132 | -0.18020 |
| <b>Toluene</b>                      |          |          |          | C | 1.52290  | -1.92600 | 0.95402  |
| 15                                  |          |          |          | C | 1.34059  | -3.31709 | 0.84452  |
| C                                   | 0.19429  | -1.19534 | -0.00934 | C | 1.44400  | -4.09734 | 1.99194  |
| C                                   | 0.90916  | 0.00028  | -0.01186 | C | 1.72472  | -3.53253 | 3.22560  |
| C                                   | 0.19396  | 1.19552  | -0.00933 | C | 1.91730  | -2.16638 | 3.32144  |
| C                                   | -1.19346 | 1.19820  | 0.00213  | C | 1.82114  | -1.34197 | 2.20316  |
| C                                   | -1.89309 | -0.00018 | 0.00872  | C | 6.17149  | 0.06379  | -0.52162 |
| C                                   | -1.19298 | -1.19846 | 0.00214  | C | 1.85025  | 3.46710  | -2.96474 |
| H                                   | 0.73380  | -2.13741 | -0.01845 | C | 3.35030  | 4.42932  | -1.22284 |
| H                                   | 0.73314  | 2.13776  | -0.01842 | C | -0.75257 | 5.48260  | 1.94833  |
| H                                   | -1.73027 | 2.14055  | 0.00188  | C | 1.08717  | -3.95985 | -0.49730 |
| H                                   | -2.97720 | -0.00041 | 0.01475  | C | 2.41028  | -4.26048 | -1.20018 |
| H                                   | -1.72954 | -2.14095 | 0.00190  | C | 2.03419  | 0.14921  | 2.38513  |
| C                                   | 2.40860  | 0.00012  | 0.00971  | C | 3.44118  | 0.44814  | 2.89920  |
| H                                   | 2.78405  | -0.01618 | 1.03794  | C | 0.98565  | 0.78334  | 3.29314  |
| H                                   | 2.81372  | -0.87632 | -0.50019 | C | 0.21031  | -5.20097 | -0.43021 |
| H                                   | 2.81345  | 0.89215  | -0.47243 | C | -3.79246 | 3.81757  | -0.91478 |
| <b>Toluene activation TS, ortho</b> |          |          |          | C | -2.01930 | -1.08946 | 3.78667  |
| 110                                 |          |          |          | H | -1.08511 | -2.24463 | -0.68386 |
| C                                   | -0.75131 | -2.45566 | -2.89968 | H | 4.06603  | -1.54763 | 0.01194  |
| C                                   | -1.40541 | -1.69671 | -1.80875 | H | 5.07035  | 2.42858  | -1.22190 |
| C                                   | -2.87182 | -1.79776 | -1.86613 | H | 1.35452  | 5.35598  | 0.26319  |
| C                                   | -3.44327 | -2.94617 | -2.35434 | H | -1.92003 | 3.05381  | 1.80935  |
| C                                   | -2.68641 | -3.93533 | -3.00645 | H | 1.35967  | 4.43526  | -3.09505 |
| C                                   | -1.37420 | -3.58789 | -3.37093 | H | 1.13628  | 2.68264  | -3.21719 |
| Al                                  | -0.39283 | -0.49487 | -0.73302 | H | 2.69137  | 3.40107  | -3.65981 |
| N                                   | -1.33077 | 0.81107  | 0.28235  | H | 3.73024  | 4.36567  | -0.20117 |
| C                                   | -2.68482 | 0.69683  | 0.68128  | H | 2.88198  | 5.40638  | -1.36002 |
| C                                   | -3.06318 | -0.24940 | 1.65080  | H | 4.19566  | 4.37252  | -1.91201 |
| C                                   | -4.40129 | -0.33274 | 2.02560  | H | 1.29140  | -5.16769 | 1.91538  |
| C                                   | -5.36279 | 0.48311  | 1.46110  | H | 1.79161  | -4.15755 | 4.11031  |
| C                                   | -4.99169 | 1.37515  | 0.46918  | H | 2.13302  | -1.72158 | 4.28801  |
| C                                   | -3.67277 | 1.48310  | 0.04681  | H | 1.93820  | 0.63181  | 1.41425  |
| C                                   | -2.08259 | -1.22041 | 2.26685  | H | -0.01382 | 0.66175  | 2.87733  |
| C                                   | -2.41259 | -2.65768 | 1.86585  | H | 1.17545  | 1.85601  | 3.39170  |
| C                                   | -3.37279 | 2.36859  | -1.14759 | H | 0.99699  | 0.33988  | 4.29302  |
| C                                   | -4.02231 | 1.80645  | -2.41189 | H | 3.60758  | 1.52851  | 2.93940  |
| O                                   | 0.72078  | 1.14099  | -1.27585 | H | 4.19756  | 0.01265  | 2.24430  |
| C                                   | 2.09433  | 0.88966  | -1.18793 | H | 3.58787  | 0.04695  | 3.90667  |
|                                     |          |          |          | H | 0.55072  | -3.24290 | -1.11788 |
|                                     |          |          |          | H | 0.72602  | -6.05286 | 0.02728  |

|                                          |          |          |          |   |          |          |          |
|------------------------------------------|----------|----------|----------|---|----------|----------|----------|
| H                                        | -0.08947 | -5.48340 | -1.44146 | C | 1.98529  | -1.85974 | -4.39286 |
| H                                        | -0.70640 | -5.00156 | 0.12849  | C | 3.57466  | -1.10201 | 1.65828  |
| H                                        | 3.00449  | -3.35276 | -1.32947 | C | 3.51756  | -2.32767 | 2.56467  |
| H                                        | 2.22025  | -4.68101 | -2.19164 | O | -0.00328 | 1.25735  | 0.57005  |
| H                                        | 3.00453  | -4.98006 | -0.62628 | C | -1.18264 | 1.94634  | 0.42730  |
| H                                        | -4.69086 | -1.06477 | 2.77227  | C | -1.26276 | 3.29727  | 0.64156  |
| H                                        | -6.40000 | 0.40542  | 1.76956  | C | -0.01019 | 4.02742  | 1.12128  |
| H                                        | -5.75120 | 1.97882  | -0.01744 | C | 1.21427  | 3.32238  | 0.54081  |
| H                                        | -2.29733 | 2.36397  | -1.31732 | C | 1.14489  | 1.97009  | 0.32797  |
| H                                        | -4.87542 | 3.90214  | -0.78407 | C | -2.51828 | 3.88695  | 0.43699  |
| H                                        | -3.51302 | 4.43592  | -1.77280 | C | -3.60101 | 3.11469  | 0.02770  |
| H                                        | -3.30866 | 4.23053  | -0.02730 | C | -3.45477 | 1.74718  | -0.21176 |
| H                                        | -3.68612 | 0.78629  | -2.61097 | C | -2.21435 | 1.11975  | -0.03779 |
| H                                        | -3.76538 | 2.42857  | -3.27506 | C | 2.15655  | 1.16260  | -0.20818 |
| H                                        | -5.11273 | 1.79043  | -2.32209 | C | 3.36919  | 1.81527  | -0.46565 |
| H                                        | -1.08815 | -0.98875 | 1.87684  | C | 3.50576  | 3.18536  | -0.23701 |
| H                                        | -1.82065 | -0.06067 | 4.09474  | C | 2.43959  | 3.93673  | 0.24732  |
| H                                        | -1.22371 | -1.72588 | 4.18353  | N | -1.86151 | -0.16761 | -0.29504 |
| H                                        | -2.96240 | -1.40077 | 4.24607  | C | -2.88383 | -1.02738 | -0.75569 |
| H                                        | -3.35793 | -2.97696 | 2.31687  | C | -3.69601 | -1.71178 | 0.16679  |
| H                                        | -1.62327 | -3.33163 | 2.20899  | C | -4.71248 | -2.53380 | -0.31036 |
| H                                        | -2.50401 | -2.75935 | 0.78200  | C | -4.92969 | -2.69072 | -1.66859 |
| H                                        | -4.52433 | -3.06235 | -2.28699 | C | -4.11732 | -2.02485 | -2.57097 |
| H                                        | -3.16105 | -4.81696 | -3.42241 | C | -3.09085 | -1.19269 | -2.13643 |
| H                                        | -0.85930 | -4.19069 | -4.12105 | C | -4.95137 | 3.74801  | -0.15577 |
| H                                        | -1.09277 | 5.14768  | 2.93107  | C | 0.05280  | 3.92540  | 2.65583  |
| H                                        | 0.07027  | 6.18588  | 2.09335  | C | -0.04117 | 5.49873  | 0.72312  |
| H                                        | -1.58053 | 6.03166  | 1.48720  | C | 4.82770  | 3.84351  | -0.51485 |
| H                                        | 6.75528  | 0.97300  | -0.36145 | C | -3.49699 | -1.54611 | 1.65632  |
| H                                        | 6.32975  | -0.60016 | 0.33181  | C | -4.59495 | -0.67709 | 2.26830  |
| H                                        | 6.57781  | -0.43939 | -1.40502 | C | -2.24011 | -0.45222 | -3.14174 |
| H                                        | -3.49650 | -1.03769 | -1.40889 | C | -3.01040 | 0.71196  | -3.76327 |
| C                                        | 0.53877  | -1.96402 | -3.48339 | C | -1.68075 | -1.37783 | -4.21404 |
| H                                        | 0.45181  | -0.91094 | -3.79126 | C | -3.39582 | -2.88349 | 2.38042  |
| H                                        | 1.39253  | -2.00867 | -2.79133 | C | 4.67415  | -0.14765 | 2.12330  |
| H                                        | 0.81832  | -2.54170 | -4.37096 | C | 2.51287  | 0.48505  | -3.68926 |
| <b>Toluene activation ortho, product</b> |          |          |          | H | -0.05983 | -1.94433 | -1.29105 |
| 110                                      |          |          |          | H | -4.29781 | 1.16409  | -0.56635 |
| C                                        | 0.01117  | -1.53012 | 2.95950  | H | -2.65610 | 4.94977  | 0.59482  |
| C                                        | 0.06580  | -1.93034 | 1.60984  | H | 2.56773  | 5.00193  | 0.39715  |
| C                                        | 0.16490  | -3.30661 | 1.37048  | H | 4.19794  | 1.24797  | -0.87520 |
| C                                        | 0.21063  | -4.25323 | 2.38947  | H | 0.95603  | 4.41524  | 3.03060  |
| C                                        | 0.15392  | -3.83374 | 3.70784  | H | 0.07228  | 2.88142  | 2.97226  |
| C                                        | 0.05394  | -2.47597 | 3.98189  | H | -0.82399 | 4.40274  | 3.10268  |
| Al                                       | -0.00831 | -0.84378 | -0.09083 | H | -0.08574 | 5.61411  | -0.36160 |
| N                                        | 1.81531  | -0.13357 | -0.44711 | H | 0.84725  | 6.01476  | 1.09228  |
| C                                        | 2.86798  | -1.01205 | -0.79444 | H | -0.90784 | 5.99658  | 1.16237  |
| C                                        | 3.04174  | -1.41446 | -2.13324 | H | -5.34307 | -3.06226 | 0.39765  |
| C                                        | 4.10200  | -2.25788 | -2.44910 | H | -5.72684 | -3.33608 | -2.02386 |
| C                                        | 4.98379  | -2.70131 | -1.47675 | H | -4.28412 | -2.15271 | -3.63590 |
| C                                        | 4.79764  | -2.31592 | -0.16198 | H | -1.39472 | -0.03721 | -2.58947 |
| C                                        | 3.74464  | -1.48215 | 0.20300  | H | -1.10344 | -2.18410 | -3.75794 |
| C                                        | 2.10784  | -0.90827 | -3.21055 | H | -1.02171 | -0.82044 | -4.88573 |
|                                          |          |          |          | H | -2.47372 | -1.81984 | -4.82528 |

|                                    |          |          |          |   |          |          |          |
|------------------------------------|----------|----------|----------|---|----------|----------|----------|
| H                                  | -2.37270 | 1.26632  | -4.45894 | H | 5.57601  | -0.21171 | -0.18196 |
| H                                  | -3.35786 | 1.40511  | -2.99456 | C | 3.53509  | -0.41618 | -0.84968 |
| H                                  | -3.88275 | 0.35039  | -4.31801 | C | 3.65338  | -1.59025 | -1.82768 |
| H                                  | -2.54465 | -1.03129 | 1.78813  | C | 2.44956  | -2.48949 | -1.54488 |
| H                                  | -4.33722 | -3.44085 | 2.33607  | C | 2.47292  | -3.87102 | -1.34689 |
| H                                  | -3.15203 | -2.72208 | 3.43375  | H | 3.37548  | -4.43809 | -1.53990 |
| H                                  | -2.60540 | -3.50057 | 1.95120  | C | 1.34594  | -4.52683 | -0.84790 |
| H                                  | -4.62996 | 0.30590  | 1.79460  | C | 0.21759  | -3.80630 | -0.46415 |
| H                                  | -4.41487 | -0.53379 | 3.33831  | H | -0.60156 | -4.30414 | 0.04311  |
| H                                  | -5.57632 | -1.14934 | 2.15166  | C | 0.16906  | -2.41647 | -0.62895 |
| H                                  | 4.24304  | -2.57616 | -3.47546 | C | 1.25763  | -1.85268 | -1.29965 |
| H                                  | 5.80722  | -3.35580 | -1.74461 | C | 3.57282  | -1.04999 | -3.26559 |
| H                                  | 5.47735  | -2.67576 | 0.60405  | H | 4.40421  | -0.36623 | -3.45587 |
| H                                  | 2.61614  | -0.58759 | 1.74271  | H | 3.62587  | -1.87701 | -3.97846 |
| H                                  | 5.65717  | -0.62553 | 2.05453  | H | 2.63963  | -0.51214 | -3.43483 |
| H                                  | 4.51221  | 0.13745  | 3.16746  | C | 4.96592  | -2.33718 | -1.64950 |
| H                                  | 4.69104  | 0.76237  | 1.52163  | H | 5.06741  | -2.73484 | -0.63769 |
| H                                  | 2.73444  | -3.01644 | 2.24707  | H | 5.02956  | -3.16690 | -2.35682 |
| H                                  | 3.29704  | -2.02479 | 3.59183  | H | 5.80931  | -1.67257 | -1.84884 |
| H                                  | 4.47164  | -2.86451 | 2.57319  | C | 0.22923  | 2.76093  | 0.70933  |
| H                                  | 1.12174  | -0.83324 | -2.74534 | C | 0.73507  | 3.89746  | 0.03884  |
| H                                  | 2.54027  | 1.19836  | -2.86493 | C | 0.38315  | 5.16042  | 0.49806  |
| H                                  | 1.80083  | 0.85338  | -4.43495 | H | 0.77111  | 6.03404  | -0.01609 |
| H                                  | 3.50587  | 0.46142  | -4.15128 | C | -0.48442 | 5.32718  | 1.56415  |
| H                                  | 2.91758  | -1.92958 | -4.96253 | H | -0.75619 | 6.32222  | 1.90031  |
| H                                  | 1.21494  | -1.50198 | -5.07949 | C | -1.02689 | 4.21061  | 2.17051  |
| H                                  | 1.70593  | -2.86412 | -4.06577 | H | -1.73897 | 4.33311  | 2.97996  |
| H                                  | 0.28888  | -5.31000 | 2.15155  | C | -0.69109 | 2.92336  | 1.76063  |
| H                                  | 0.18599  | -4.55296 | 4.52047  | C | -1.36872 | 1.75418  | 2.43748  |
| H                                  | 0.00845  | -2.14226 | 5.01590  | H | -0.96944 | 0.83459  | 2.00200  |
| H                                  | 5.20715  | 3.56971  | -1.50331 | C | -2.87531 | 1.77030  | 2.18319  |
| H                                  | 4.74395  | 4.93174  | -0.47320 | H | -3.34351 | 2.62356  | 2.68470  |
| H                                  | 5.58323  | 3.53849  | 0.21688  | H | -3.09858 | 1.83949  | 1.11614  |
| H                                  | -4.88274 | 4.83793  | -0.13598 | H | -3.32905 | 0.85364  | 2.56912  |
| H                                  | -5.40175 | 3.45339  | -1.10785 | C | -1.07893 | 1.71194  | 3.93602  |
| H                                  | -5.64292 | 3.44275  | 0.63650  | H | -1.49144 | 0.79752  | 4.37099  |
| H                                  | 0.20451  | -3.64807 | 0.33874  | H | -0.00614 | 1.73442  | 4.13951  |
| C                                  | -0.09283 | -0.07796 | 3.33346  | H | -1.53485 | 2.56557  | 4.44671  |
| H                                  | 0.77809  | 0.48311  | 2.98308  | C | 1.57424  | 3.80253  | -1.22139 |
| H                                  | -0.97059 | 0.38956  | 2.87900  | H | 1.77762  | 2.75154  | -1.42045 |
| H                                  | -0.16356 | 0.04842  | 4.41680  | C | 0.80602  | 4.34084  | -2.42809 |
| <b>Toluene activation TS, meta</b> |          |          |          | H | 0.57016  | 5.40221  | -2.30521 |
| <b>110</b>                         |          |          |          | H | 1.40935  | 4.23404  | -3.33509 |
| Al                                 | -0.56763 | 0.27948  | -0.65869 | H | -0.13244 | 3.80166  | -2.57525 |
| O                                  | 1.20876  | -0.45527 | -1.36813 | C | 2.91944  | 4.50898  | -1.07297 |
| N                                  | 0.59111  | 1.46377  | 0.27075  | H | 3.48385  | 4.11050  | -0.22762 |
| N                                  | -0.74107 | -1.53714 | -0.10437 | H | 3.52069  | 4.37386  | -1.97679 |
| C                                  | 2.28189  | 0.11707  | -0.67688 | H | 2.78833  | 5.58429  | -0.91949 |
| C                                  | 1.92618  | 1.14129  | 0.20233  | C | -1.41315 | -1.91453 | 1.08928  |
| C                                  | 2.98719  | 1.69090  | 0.93057  | C | -0.67303 | -2.09844 | 2.27560  |
| H                                  | 2.78032  | 2.48951  | 1.63457  | C | -1.35955 | -2.37700 | 3.45498  |
| C                                  | 4.28644  | 1.21335  | 0.77384  | H | -0.79777 | -2.50495 | 4.37511  |
| C                                  | 4.56157  | 0.15985  | -0.10040 | C | -2.73916 | -2.47382 | 3.47740  |
|                                    |          |          |          | H | -3.25736 | -2.67939 | 4.40859  |



|                                         |          |          |          |   |          |          |          |
|-----------------------------------------|----------|----------|----------|---|----------|----------|----------|
| C                                       | -3.45514 | -2.30476 | 2.30334  | C | -2.09377 | -0.87563 | -0.74826 |
| H                                       | -4.53640 | -2.37954 | 2.31945  | C | -3.26710 | -1.36449 | -1.33906 |
| C                                       | -2.81535 | -2.02722 | 1.09911  | H | -4.05792 | -0.66800 | -1.59610 |
| C                                       | -3.60464 | -1.89342 | -0.17874 | C | -3.41354 | -2.72178 | -1.62713 |
| H                                       | -3.06752 | -1.21660 | -0.84499 | C | -2.39348 | -3.62561 | -1.34072 |
| C                                       | -3.68306 | -3.23783 | -0.90110 | H | -2.52254 | -4.67071 | -1.59583 |
| H                                       | -4.21104 | -3.98253 | -0.29509 | C | -1.21488 | -3.18499 | -0.72810 |
| H                                       | -4.21687 | -3.11973 | -1.84834 | C | -0.03039 | -4.05933 | -0.31892 |
| H                                       | -2.68536 | -3.62291 | -1.12432 | C | 1.24198  | -3.23771 | -0.51662 |
| C                                       | -4.98994 | -1.29524 | 0.01352  | C | 2.48281  | -3.72665 | -0.94203 |
| H                                       | -4.94046 | -0.37146 | 0.59336  | H | 2.61187  | -4.77889 | -1.16546 |
| H                                       | -5.40789 | -1.03686 | -0.96130 | C | 3.56248  | -2.85937 | -1.08839 |
| H                                       | -5.67946 | -1.98784 | 0.50991  | C | 3.41750  | -1.49113 | -0.85632 |
| C                                       | 0.83980  | -1.99628 | 2.32676  | H | 4.25305  | -0.82180 | -1.02992 |
| H                                       | 1.20536  | -1.79081 | 1.32228  | C | 2.18357  | -0.95556 | -0.45914 |
| C                                       | 1.46828  | -3.31463 | 2.77417  | C | 1.16899  | -1.89537 | -0.24660 |
| H                                       | 1.19348  | -3.55384 | 3.80602  | C | -0.16969 | -4.39178 | 1.17771  |
| H                                       | 1.14628  | -4.13833 | 2.13489  | H | -1.09094 | -4.95350 | 1.35579  |
| H                                       | 2.55902  | -3.25049 | 2.72234  | H | 0.68327  | -4.98833 | 1.51327  |
| C                                       | 1.31776  | -0.84706 | 3.20807  | H | -0.20548 | -3.47920 | 1.77520  |
| H                                       | 2.41080  | -0.80706 | 3.21146  | C | 0.01097  | -5.35674 | -1.11435 |
| H                                       | 0.95351  | 0.10819  | 2.83198  | H | 0.11020  | -5.16366 | -2.18446 |
| H                                       | 0.97552  | -0.96154 | 4.24069  | H | 0.85159  | -5.97526 | -0.79284 |
| C                                       | -2.73984 | 0.18095  | -2.62347 | H | -0.89964 | -5.93604 | -0.94778 |
| H                                       | -2.26994 | -0.70789 | -3.03939 | C | -2.81734 | 1.35254  | -0.47148 |
| C                                       | -2.03575 | 1.00374  | -1.61764 | C | -3.76247 | 1.32106  | 0.57378  |
| C                                       | -2.42836 | 2.42334  | -1.70271 | C | -4.82639 | 2.21798  | 0.55020  |
| H                                       | -1.78118 | 3.20397  | -1.31743 | H | -5.55707 | 2.19198  | 1.35281  |
| C                                       | -3.69613 | 2.72826  | -2.12050 | C | -4.95910 | 3.14688  | -0.46505 |
| H                                       | -4.02414 | 3.76664  | -2.07910 | H | -5.79181 | 3.84306  | -0.46660 |
| C                                       | -4.56570 | 1.76227  | -2.66603 | C | -4.01037 | 3.19316  | -1.47392 |
| H                                       | -5.54954 | 2.04683  | -3.02666 | H | -4.10911 | 3.93494  | -2.25759 |
| C                                       | -4.00783 | 0.52355  | -3.03464 | C | -2.93699 | 2.30863  | -1.49917 |
| H                                       | -2.43294 | 0.62933  | -0.46424 | C | -1.92101 | 2.35037  | -2.61887 |
| C                                       | 5.40187  | 1.85436  | 1.54911  | H | -0.94963 | 2.17930  | -2.14728 |
| H                                       | 5.08572  | 2.10577  | 2.56423  | C | -1.85526 | 3.69822  | -3.32342 |
| H                                       | 6.26969  | 1.19469  | 1.61537  | H | -2.77059 | 3.91153  | -3.88517 |
| H                                       | 5.72782  | 2.78390  | 1.07020  | H | -1.69130 | 4.51151  | -2.61225 |
| C                                       | 1.36117  | -6.01852 | -0.67965 | H | -1.02982 | 3.70388  | -4.03799 |
| H                                       | 0.88413  | -6.51348 | -1.53177 | C | -2.15726 | 1.23172  | -3.63199 |
| H                                       | 2.38240  | -6.39900 | -0.60587 | H | -1.37828 | 1.24351  | -4.40140 |
| H                                       | 0.81667  | -6.32114 | 0.21816  | H | -2.14588 | 0.25218  | -3.15386 |
| C                                       | -4.76941 | -0.39157 | -3.95404 | H | -3.12556 | 1.35816  | -4.12818 |
| H                                       | -5.69864 | -0.73647 | -3.48490 | C | -3.65141 | 0.34801  | 1.72877  |
| H                                       | -5.05096 | 0.11251  | -4.88534 | H | -2.71067 | -0.19096 | 1.61310  |
| H                                       | -4.17759 | -1.27543 | -4.20768 | C | -3.59270 | 1.07257  | 3.07055  |
|                                         |          |          |          | H | -4.52884 | 1.59896  | 3.28301  |
|                                         |          |          |          | H | -3.41963 | 0.35534  | 3.87795  |
|                                         |          |          |          | H | -2.77582 | 1.79418  | 3.09079  |
|                                         |          |          |          | C | -4.78935 | -0.67151 | 1.72110  |
|                                         |          |          |          | H | -4.81087 | -1.23249 | 0.78531  |
|                                         |          |          |          | H | -4.66476 | -1.38429 | 2.54204  |
|                                         |          |          |          | H | -5.75819 | -0.17766 | 1.85026  |
|                                         |          |          |          | C | 2.86383  | 1.30366  | -0.45607 |
| <b>Toluene activation product, meta</b> |          |          |          |   |          |          |          |
| 110                                     |          |          |          |   |          |          |          |
| Al                                      | 0.01916  | 0.91128  | 0.24953  |   |          |          |          |
| O                                       | -0.01363 | -1.31812 | 0.15517  |   |          |          |          |
| N                                       | -1.75308 | 0.41976  | -0.48175 |   |          |          |          |
| N                                       | 1.82890  | 0.35167  | -0.31215 |   |          |          |          |
| C                                       | -1.13668 | -1.84664 | -0.43773 |   |          |          |          |

|   |          |          |          |    |          |          |          |
|---|----------|----------|----------|----|----------|----------|----------|
| C | 3.01354  | 1.99384  | -1.67315 | C  | -2.52520 | -0.95077 | -2.67152 |
| C | 4.05857  | 2.90106  | -1.80907 | C  | -2.23962 | 0.02694  | -1.59954 |
| H | 4.18195  | 3.43883  | -2.74261 | C  | -3.22695 | 1.12288  | -1.61194 |
| C | 4.94640  | 3.13224  | -0.77019 | C  | -4.51504 | 0.84689  | -1.99149 |
| H | 5.75860  | 3.84142  | -0.89479 | C  | -4.89128 | -0.37373 | -2.59222 |
| C | 4.78145  | 2.46447  | 0.43010  | C  | -3.83243 | -1.18261 | -3.03443 |
| H | 5.46600  | 2.65783  | 1.25034  | Al | -0.58457 | -0.01094 | -0.67299 |
| C | 3.74397  | 1.55404  | 0.61160  | N  | -0.06640 | 1.52263  | 0.32216  |
| C | 3.58180  | 0.85987  | 1.94560  | C  | -0.96423 | 2.50066  | 0.81528  |
| H | 2.64394  | 0.30418  | 1.90660  | C  | -1.85439 | 2.18591  | 1.85798  |
| C | 4.71233  | -0.13365 | 2.20724  | C  | -2.72257 | 3.16916  | 2.32408  |
| H | 5.68016  | 0.37705  | 2.25373  | C  | -2.73538 | 4.43934  | 1.78091  |
| H | 4.55519  | -0.64395 | 3.16242  | C  | -1.89221 | 4.72709  | 0.72109  |
| H | 4.76120  | -0.89057 | 1.42228  | C  | -1.02061 | 3.77522  | 0.20725  |
| C | 3.46854  | 1.86113  | 3.09114  | C  | -1.94201 | 0.80479  | 2.46560  |
| H | 2.67786  | 2.58648  | 2.89718  | C  | -3.30254 | 0.16805  | 2.18565  |
| H | 3.21931  | 1.34303  | 4.02126  | C  | -0.23829 | 4.12441  | -1.04477 |
| H | 4.40728  | 2.40332  | 3.24559  | C  | -1.17747 | 4.32498  | -2.23388 |
| C | 2.06916  | 1.71858  | -2.82069 | O  | 1.32498  | 0.16111  | -1.39803 |
| H | 1.12381  | 1.40551  | -2.37161 | C  | 1.99515  | -1.06831 | -1.39574 |
| C | 2.57045  | 0.56254  | -3.68555 | C  | 3.34330  | -1.09191 | -1.65712 |
| H | 3.53018  | 0.81714  | -4.14804 | C  | 4.01427  | 0.26288  | -1.88425 |
| H | 2.70824  | -0.34404 | -3.09493 | C  | 3.39451  | 1.21175  | -0.85274 |
| H | 1.85432  | 0.34419  | -4.48407 | C  | 2.03719  | 1.11920  | -0.66841 |
| C | 1.79161  | 2.94578  | -3.67684 | C  | 3.98498  | -2.32429 | -1.52373 |
| H | 1.02604  | 2.71177  | -4.42125 | C  | 3.27648  | -3.43788 | -1.06869 |
| H | 1.43363  | 3.77882  | -3.06808 | C  | 1.94887  | -3.31806 | -0.66554 |
| H | 2.68115  | 3.27417  | -4.22345 | C  | 1.28108  | -2.09115 | -0.76609 |
| C | -0.08898 | -0.19310 | 3.08122  | C  | 1.27157  | 1.83320  | 0.25484  |
| H | -0.05814 | -1.18085 | 2.62575  | C  | 1.98333  | 2.76283  | 1.02101  |
| C | -0.06739 | 0.93496  | 2.25484  | C  | 3.35709  | 2.92465  | 0.85614  |
| C | -0.10254 | 2.17535  | 2.90317  | C  | 4.06382  | 2.14903  | -0.06507 |
| H | -0.08623 | 3.08275  | 2.30372  | N  | 0.07838  | -1.73846 | -0.21406 |
| C | -0.15272 | 2.27983  | 4.28791  | C  | -0.34977 | -2.43704 | 0.94667  |
| H | -0.17197 | 3.25736  | 4.76197  | C  | -1.55417 | -3.16348 | 0.92312  |
| C | -0.17550 | 1.13479  | 5.07105  | C  | -1.99949 | -3.75619 | 2.10091  |
| H | -0.21413 | 1.21455  | 6.15450  | C  | -1.28021 | -3.64557 | 3.28002  |
| C | -0.14794 | -0.12221 | 4.47176  | C  | -0.08845 | -2.94365 | 3.28917  |
| H | 0.09059  | 2.46437  | -0.23673 | C  | 0.39851  | -2.33075 | 2.13709  |
| C | -4.69639 | -3.20410 | -2.24331 | C  | 3.96008  | -4.77081 | -0.97012 |
| H | -5.01285 | -2.55278 | -3.06249 | C  | 3.68381  | 0.77748  | -3.29563 |
| H | -4.58977 | -4.21750 | -2.63676 | C  | 5.52428  | 0.17467  | -1.72786 |
| H | -5.50805 | -3.21638 | -1.50791 | C  | 4.07716  | 3.95841  | 1.67402  |
| C | 4.90578  | -3.39257 | -1.49966 | C  | -2.32159 | -3.33629 | -0.36346 |
| H | 5.59395  | -3.42993 | -0.64844 | C  | -1.78604 | -4.53521 | -1.14535 |
| H | 4.82304  | -4.40406 | -1.90374 | C  | 1.70726  | -1.56807 | 2.22107  |
| H | 5.36799  | -2.75845 | -2.26103 | C  | 2.85838  | -2.48744 | 2.62435  |
| C | -0.21445 | -1.37221 | 5.30096  | C  | 1.62427  | -0.36776 | 3.15828  |
| H | 0.26738  | -1.23631 | 6.27293  | C  | -3.82716 | -3.43815 | -0.17394 |
| H | -1.25306 | -1.66665 | 5.48899  | C  | 0.65529  | 5.34605  | -0.84504 |
| H | 0.27253  | -2.20765 | 4.79242  | C  | -1.65458 | 0.81793  | 3.96510  |
|   |          |          |          | H  | -2.40995 | -0.55378 | -0.48119 |
|   |          |          |          | H  | 1.44480  | -4.15351 | -0.19221 |
|   |          |          |          | H  | 5.04377  | -2.41739 | -1.73280 |

Toluene activation TS, para  
110



|   |          |          |          |   |          |          |          |
|---|----------|----------|----------|---|----------|----------|----------|
| C | -4.78321 | -0.48708 | -1.77116 | H | -5.57851 | -2.43539 | 0.36229  |
| C | -2.14274 | 1.48744  | 3.54803  | H | -2.71041 | -0.82334 | -1.37591 |
| H | 0.07166  | -1.67215 | 1.74186  | H | -5.76068 | -0.92832 | -1.54940 |
| H | 4.26625  | 1.31478  | 0.24675  | H | -4.65851 | -0.47787 | -2.85827 |
| H | 2.65777  | 4.45795  | -2.18277 | H | -4.78468 | 0.54645  | -1.42102 |
| H | -2.47425 | 4.69970  | -1.78777 | H | -2.82862 | -3.29357 | -1.21452 |
| H | -4.04195 | 1.63921  | 0.77219  | H | -3.44753 | -2.69023 | -2.75014 |
| H | -1.05699 | 3.01780  | -4.23575 | H | -4.57848 | -3.23060 | -1.50044 |
| H | -0.18445 | 1.60750  | -3.61642 | H | -0.95030 | -0.20445 | 3.02205  |
| H | 0.71661  | 2.92816  | -4.37792 | H | -2.12921 | 1.92835  | 2.55120  |
| H | 0.16443  | 5.42932  | -1.64487 | H | -1.35886 | 1.96767  | 4.14288  |
| H | -0.84511 | 5.24340  | -3.09128 | H | -3.10848 | 1.71868  | 4.01030  |
| H | 0.90556  | 5.15807  | -3.23297 | H | -2.77055 | -0.39245 | 5.46935  |
| H | 5.43423  | -2.83240 | 0.73576  | H | -1.02777 | -0.15017 | 5.45109  |
| H | 5.73033  | -2.36230 | 3.14009  | H | -1.70279 | -1.68102 | 4.88236  |
| H | 4.17047  | -0.84658 | 4.29427  | H | -0.15152 | -3.76857 | 0.20028  |
| H | 1.12989  | 0.50827  | 2.69896  | H | -0.26176 | -5.49673 | -1.53939 |
| H | 1.41903  | -0.86666 | 4.75841  | H | -0.12993 | -2.46488 | -4.54991 |
| H | 1.03256  | 0.82554  | 5.10916  | H | -0.02083 | -0.74364 | -2.81694 |
| H | 2.68004  | 0.24646  | 5.32122  | H | -4.97229 | 4.03680  | 0.69217  |
| H | 1.88529  | 2.66915  | 3.63770  | H | -4.53999 | 5.03711  | -0.70212 |
| H | 2.73754  | 2.29400  | 2.13254  | H | -5.47285 | 3.55404  | -0.92607 |
| H | 3.55386  | 2.07047  | 3.68711  | H | 4.86979  | 4.62135  | -1.37228 |
| H | 2.63259  | -1.41492 | -1.28339 | H | 5.40523  | 3.57727  | -0.04719 |
| H | 4.35569  | -3.91123 | -0.95624 | H | 5.62529  | 3.06277  | -1.71732 |
| H | 3.17531  | -3.57846 | -2.23444 | C | -0.32157 | -5.16078 | -4.23985 |
| H | 2.62728  | -3.79949 | -0.57486 | H | -1.36729 | -5.34603 | -4.50988 |
| H | 4.76866  | -0.22089 | -1.67603 | H | 0.20126  | -4.85919 | -5.15120 |
| H | 4.54505  | -1.52470 | -2.85137 | H | 0.10147  | -6.11099 | -3.90438 |
| H | 5.66462  | -1.74009 | -1.49711 |   |          |          |          |
| H | -4.12137 | -1.44301 | 4.24318  |   |          |          |          |
| H | -5.81472 | -2.51467 | 2.81785  |   |          |          |          |

## References

- S1. J. Hicks, P. Vasko, J. M. Goicoechea, S. Aldridge, *Nature* **2018**, *557*, 92-95.
- S2. J. Cosier, A. M. Glazer, *J. Appl. Cryst.* **1986**, *19*, 105-107.
- S3. CrysAlisPro, Agilent Technologies, Version 1.171.35.8.
- S4. G. M. Sheldrick, SHELX-2018 package (**2018**).
- S5. L. J. Barbour, *J. Supramol. Chem.* **2001**, *1*, 189-191.
- S6. Gaussian 16, Revision C.01, M. J. Frisch, G. W. Trucks, H. B. Schlegel, G. E. Scuseria, M. A. Robb, J. R. Cheeseman, G. Scalmani, V. Barone, G. A. Petersson, H. Nakatsuji, X. Li, M. Caricato, A. V. Marenich, J. Bloino, B. G. Janesko, R. Gomperts, B. Mennucci, H. P. Hratchian, J. V. Ortiz, A. F. Izmaylov, J. L. Sonnenberg, D. Williams-Young, F. Ding, F. Lipparini, F. Egidi, J. Goings, B. Peng, A. Petrone, T. Henderson, D. Ranasinghe, V. G. Zakrzewski, J. Gao, N. Rega, G. Zheng, W. Liang, M. Hada, M. Ehara, K. Toyota, R. Fukuda, J. Hasegawa, M. Ishida, T. Nakajima, Y. Honda, O. Kitao, H. Nakai, T. Vreven, K. Throssell, J. A. Montgomery, Jr., J. E. Peralta, F. Ogliaro, M. J. Bearpark, J. J. Heyd, E. N. Brothers, K. N. Kudin, V. N. Staroverov, T. A. Keith, R. Kobayashi, J. Normand, K. Raghavachari, A. P. Rendell, J. C. Burant, S. S. Iyengar, J. Tomasi, M. Cossi, J. M. Millam, M. Klene, C. Adamo, R. Cammi, J. W. Ochterski, R. L. Martin, K. Morokuma, O. Farkas, J. B. Foresman, and D. J. Fox, Gaussian, Inc., Wallingford CT, 2019.
- S7. (a) J. P. Perdew, K. Burke, M. Ernzerhof, *Phys. Rev. Lett.*, **1996**, *77*, 3865-3868; (b) J. P. Perdew, K. Burke, M. Ernzerhof, *Phys. Rev. Lett.*, **1997**, *78*, 1396; (c) C. Adamo, V. Barone, *J. Chem. Phys.*, **1999**, *110*, 6158-6169.
- S8. (a) A. Schäfer, H. Horn, R. Ahlrichs, *J. Chem. Phys.* **1992**, *97*, 2571-2577; (b) A. Schäfer, H. Horn, R. Ahlrichs, *J. Chem. Phys.* **1994**, *100*, 5829-5835.
- S9. S. Grimme, S. Ehrlich, L. Goerigk, *J. Comp. Chem.* **2011**, *32*, 1456-1465.
- S10. NBO 7.0. E. D. Glendening, J. K. Badenhoop, A. E. Reed, J. E. Carpenter, J. A. Bohmann, C. M. Morales, P. Karafiloglou, C. R. Landis, and F. Weinhold, Theoretical Chemistry Institute, University of Wisconsin, Madison, WI, 2018.
